# Supplementary material for: Causality Verification for the Correlation between the Presence of Nonstarter Bacteria and Flavor Characteristics in Soft-Type Ripened Cheeses
Source: PubMed Central journal article supplement (PMC9769828; doi:10.1128/spectrum.02894-22), 2022-11-10
Supplement: spectrum.02894-22-s0001.pdf [file spectrum.02894-22-s0001.pdf]

**Table S1.** Bacterial abundance data at the genus level generated by amplicon sequencing in Japanese and French surface mold-ripened cheeses used in this study.

| Phylum         | Genus                           | A1-core-1 | A1-core-2 | A1-core-3 | A1-rind-1 | A1-rind-2 | A1-rind-3 | A2-core-1 | A2-core-2 | A2-core-3 | A2-rind-1 | A2-rind-2 | A2-rind-3 | A3-core-1 | A3-core-2 | A3-core-3 | A3-rind-1 | A3-rind-2 | A3-rind-3 |   |
|----------------|---------------------------------|-----------|-----------|-----------|-----------|-----------|-----------|-----------|-----------|-----------|-----------|-----------|-----------|-----------|-----------|-----------|-----------|-----------|-----------|---|
| Actinobacteria | Bifidobacterium                 | 0         | 0         | 0         | 0         | 0         | 0         | 0         | 0         | 0         | 0         | 0         | 0         | 0         | 0         | 0         | 0         | 0         | 0         | 0 |
| Actinobacteria | Corynebacterium 1               | 0         | 0         | 0         | 0         | 0         | 0         | 0         | 0         | 0         | 0         | 0         | 0         | 0         | 0         | 0         | 0         | 0         | 0         | 0 |
| Actinobacteria | Actinomycetales bacterium JB111 | 0         | 0         | 0         | 0         | 0         | 0         | 0         | 0         | 0         | 0         | 0         | 0         | 0         | 0         | 0         | 0         | 0         | 0         | 0 |
| Actinobacteria | Brevibacterium                  | 0         | 0         | 0         | 0         | 2         | 0         | 0         | 0         | 0         | 0         | 0         | 0         | 0         | 0         | 0         | 0         | 0         | 0         | 0 |
| Actinobacteria | Brachybacterium                 | 0         | 0         | 0         | 0         | 0         | 0         | 0         | 0         | 0         | 0         | 0         | 0         | 0         | 0         | 0         | 0         | 0         | 0         | 0 |
| Actinobacteria | Agrococcus                      | 0         | 0         | 0         | 0         | 0         | 0         | 0         | 0         | 0         | 0         | 0         | 0         | 0         | 0         | 0         | 0         | 0         | 0         | 0 |
| Actinobacteria | Leucobacter                     | 0         | 0         | 0         | 0         | 0         | 0         | 0         | 0         | 0         | 0         | 0         | 0         | 0         | 0         | 0         | 0         | 0         | 0         | 0 |
| Actinobacteria | Microbacterium                  | 0         | 0         | 0         | 0         | 0         | 0         | 0         | 0         | 0         | 0         | 0         | 0         | 0         | 0         | 0         | 0         | 0         | 0         | 0 |
| Actinobacteria | Parafrioglobacterium            | 0         | 0         | 0         | 0         | 0         | 0         | 0         | 0         | 0         | 0         | 0         | 0         | 0         | 0         | 0         | 0         | 0         | 0         | 0 |
| Actinobacteria | D_4_Microbacteriaceae           | 0         | 0         | 0         | 0         | 0         | 0         | 0         | 0         | 0         | 0         | 0         | 0         | 0         | 0         | 0         | 0         | 0         | 0         | 0 |
| Actinobacteria | Arrhobacter                     | 0         | 0         | 0         | 0         | 0         | 0         | 0         | 0         | 0         | 0         | 0         | 0         | 0         | 0         | 0         | 0         | 0         | 0         | 0 |
| Actinobacteria | Glutamibacter                   | 0         | 0         | 0         | 0         | 0         | 0         | 0         | 0         | 0         | 0         | 0         | 0         | 0         | 0         | 0         | 0         | 0         | 0         | 1 |
| Actinobacteria | Yaniella                        | 0         | 0         | 0         | 0         | 0         | 0         | 0         | 0         | 0         | 0         | 0         | 0         | 0         | 0         | 0         | 0         | 0         | 0         | 0 |
| Actinobacteria | D_4_Micrococaceae               | 0         | 0         | 0         | 0         | 0         | 0         | 0         | 0         | 0         | 0         | 0         | 0         | 0         | 0         | 0         | 0         | 0         | 0         | 0 |
| Actinobacteria | Ruonia                          | 0         | 0         | 0         | 0         | 0         | 0         | 0         | 0         | 0         | 0         | 0         | 0         | 0         | 0         | 0         | 0         | 0         | 0         | 0 |
| Actinobacteria | Streptomyces                    | 0         | 0         | 0         | 0         | 0         | 0         | 0         | 0         | 0         | 0         | 0         | 0         | 0         | 0         | 0         | 0         | 0         | 0         | 0 |
| Bacteroidetes  | Flavobacterium                  | 0         | 0         | 0         | 0         | 0         | 0         | 0         | 0         | 0         | 0         | 0         | 0         | 0         | 0         | 0         | 0         | 0         | 0         | 0 |
| Bacteroidetes  | Mesonia                         | 0         | 0         | 0         | 0         | 0         | 0         | 0         | 0         | 0         | 0         | 0         | 0         | 0         | 0         | 0         | 0         | 0         | 0         | 0 |
| Bacteroidetes  | D_4_Flavobacteriaceae           | 0         | 0         | 0         | 0         | 0         | 0         | 0         | 0         | 0         | 0         | 0         | 0         | 0         | 0         | 0         | 0         | 0         | 0         | 0 |
| Bacteroidetes  | Chryseobacterium                | 0         | 0         | 0         | 0         | 0         | 0         | 0         | 0         | 0         | 0         | 0         | 0         | 0         | 0         | 0         | 0         | 0         | 0         | 0 |
| Bacteroidetes  | Pedobacter                      | 0         | 0         | 0         | 0         | 0         | 0         | 0         | 0         | 0         | 0         | 0         | 0         | 0         | 0         | 0         | 0         | 0         | 0         | 0 |
| Cyanobacteria  | D_3_Chloroplast                 | 0         | 0         | 0         | 0         | 0         | 0         | 0         | 0         | 0         | 0         | 0         | 0         | 0         | 0         | 0         | 0         | 0         | 0         | 0 |
| Cyanobacteria  | Arthrospira PCC-7345            | 0         | 0         | 1         | 0         | 0         | 0         | 0         | 0         | 0         | 0         | 0         | 0         | 0         | 0         | 0         | 0         | 0         | 0         | 0 |
| Firmicutes     | Geobacillus                     | 0         | 0         | 0         | 0         | 0         | 0         | 0         | 0         | 0         | 0         | 0         | 0         | 0         | 0         | 0         | 0         | 0         | 0         | 0 |
| Firmicutes     | Jeotgaliococcus                 | 0         | 0         | 0         | 0         | 0         | 0         | 0         | 0         | 0         | 0         | 0         | 0         | 0         | 0         | 0         | 0         | 0         | 0         | 0 |
| Firmicutes     | Staphylococcus                  | 0         | 0         | 0         | 0         | 0         | 0         | 0         | 0         | 0         | 0         | 0         | 0         | 0         | 0         | 0         | 0         | 0         | 0         | 0 |
| Firmicutes     | Facklamia                       | 0         | 0         | 0         | 0         | 0         | 0         | 0         | 0         | 0         | 0         | 0         | 0         | 0         | 0         | 0         | 0         | 0         | 0         | 0 |
| Firmicutes     | Alkalibacterium                 | 0         | 0         | 0         | 0         | 0         | 0         | 0         | 0         | 0         | 0         | 0         | 0         | 0         | 0         | 0         | 0         | 0         | 0         | 0 |
| Firmicutes     | Carnobacterium                  | 0         | 0         | 0         | 0         | 0         | 0         | 0         | 0         | 0         | 0         | 0         | 0         | 0         | 0         | 0         | 0         | 0         | 0         | 0 |
| Firmicutes     | Marinilactibacillus             | 0         | 0         | 0         | 0         | 0         | 0         | 0         | 0         | 0         | 0         | 0         | 0         | 0         | 0         | 0         | 0         | 0         | 0         | 0 |
| Firmicutes     | Enterococcus                    | 0         | 0         | 0         | 0         | 0         | 0         | 0         | 0         | 0         | 0         | 3         | 0         | 0         | 0         | 0         | 0         | 0         | 0         | 0 |
| Firmicutes     | Vagococcus                      | 0         | 0         | 0         | 0         | 0         | 0         | 0         | 0         | 0         | 0         | 0         | 0         | 0         | 0         | 0         | 0         | 0         | 0         | 0 |
| Firmicutes     | Lactobacillus                   | 0         | 5         | 0         | 6         | 10        | 0         | 1         | 0         | 1         | 2         | 2         | 0         | 4         | 7         | 3         | 0         | 6         | 0         | 0 |
| Firmicutes     | Leuconostoc                     | 3515      | 4689      | 5182      | 8467      | 6083      | 7860      | 6866      | 4987      | 7319      | 9913      | 7662      | 6876      | 5841      | 9772      | 8252      | 9478      | 11814     | 3920      | 0 |
| Firmicutes     | Weissella                       | 0         | 0         | 0         | 0         | 0         | 0         | 0         | 0         | 0         | 0         | 0         | 0         | 0         | 0         | 0         | 0         | 0         | 0         | 0 |
| Firmicutes     | Lactococcus                     | 36470     | 35278     | 34807     | 31506     | 33864     | 32122     | 33124     | 34987     | 32635     | 30058     | 10        | 27        | 34141     | 30196     | 31732     | 30504     | 28148     | 36065     | 0 |
| Firmicutes     | Streptococcus                   | 14        | 19        | 2         | 19        | 28        | 2         | 7         | 26        | 45        | 10        | 27        | 14        | 14        | 14        | 8         | 17        | 18        | 18        | 0 |
| Firmicutes     | D_3_Lactobacillales             | 0         | 0         | 0         | 0         | 0         | 0         | 0         | 0         | 0         | 0         | 0         | 0         | 0         | 0         | 0         | 0         | 0         | 0         | 0 |
| Firmicutes     | Clostridiisalbiter              | 0         | 0         | 0         | 0         | 0         | 0         | 0         | 0         | 0         | 0         | 0         | 0         | 0         | 0         | 0         | 0         | 0         | 0         | 0 |
| Firmicutes     | Paeniclostridium                | 0         | 0         | 0         | 0         | 0         | 0         | 0         | 0         | 0         | 0         | 0         | 0         | 0         | 0         | 2         | 0         | 0         | 0         | 0 |
| Firmicutes     | Romboutsia                      | 0         | 0         | 1         | 0         | 0         | 0         | 0         | 0         | 0         | 0         | 0         | 0         | 0         | 0         | 0         | 0         | 0         | 0         | 0 |
| Proteobacteria | Albirehodobacter                | 0         | 0         | 0         | 0         | 0         | 0         | 0         | 0         | 0         | 0         | 0         | 0         | 0         | 0         | 0         | 0         | 0         | 0         | 0 |
| Proteobacteria | D_4_Mitochondria                | 0         | 0         | 0         | 0         | 0         | 0         | 0         | 0         | 0         | 0         | 1         | 0         | 0         | 0         | 0         | 0         | 0         | 0         | 0 |
| Proteobacteria | Idiomarina                      | 0         | 0         | 0         | 0         | 0         | 0         | 0         | 0         | 0         | 0         | 0         | 0         | 0         | 0         | 0         | 0         | 0         | 0         | 0 |
| Proteobacteria | Marinobacter                    | 0         | 0         | 0         | 0         | 0         | 0         | 0         | 0         | 0         | 0         | 0         | 0         | 0         | 0         | 0         | 0         | 0         | 0         | 0 |
| Proteobacteria | Pseudoalteromonas               | 1         | 0         | 4         | 0         | 0         | 0         | 0         | 0         | 0         | 0         | 0         | 0         | 0         | 0         | 0         | 0         | 0         | 0         | 0 |
| Proteobacteria | Advenella                       | 0         | 0         | 0         | 0         | 0         | 0         | 0         | 0         | 0         | 0         | 0         | 0         | 0         | 0         | 0         | 0         | 0         | 0         | 0 |
| Proteobacteria | Delfia                          | 0         | 0         | 0         | 0         | 2         | 0         | 0         | 0         | 0         | 0         | 0         | 0         | 0         | 0         | 0         | 0         | 0         | 0         | 1 |
| Proteobacteria | D_4_Neisseriaceae               | 0         | 0         | 0         | 0         | 0         | 0         | 0         | 0         | 0         | 0         | 0         | 0         | 0         | 0         | 0         | 0         | 0         | 0         | 0 |
| Proteobacteria | Citrobacter                     | 0         | 0         | 0         | 0         | 0         | 0         | 0         | 0         | 0         | 0         | 0         | 0         | 0         | 0         | 0         | 0         | 0         | 0         | 0 |
| Proteobacteria | Escherichia-Shigella            | 0         | 0         | 0         | 0         | 0         | 0         | 0         | 0         | 0         | 0         | 0         | 0         | 0         | 0         | 0         | 0         | 0         | 0         | 0 |
| Proteobacteria | Hafnia-Obesumbacterium          | 0         | 0         | 0         | 0         | 0         | 0         | 0         | 0         | 0         | 0         | 0         | 0         | 0         | 0         | 0         | 2         | 0         | 0         | 0 |
| Proteobacteria | Serratia                        | 0         | 0         | 0         | 0         | 0         | 0         | 0         | 0         | 0         | 0         | 0         | 0         | 0         | 0         | 0         | 0         | 0         | 0         | 0 |
| Proteobacteria | D_4_Enterobacteriaceae          | 0         | 0         | 0         | 0         | 0         | 0         | 0         | 0         | 0         | 0         | 0         | 0         | 0         | 0         | 0         | 0         | 0         | 0         | 0 |
| Proteobacteria | Cobetia                         | 0         | 0         | 0         | 0         | 0         | 0         | 0         | 0         | 0         | 0         | 0         | 0         | 0         | 0         | 0         | 0         | 0         | 0         | 0 |
| Proteobacteria | Halomonas                       | 0         | 0         | 0         | 0         | 0         | 0         | 0         | 0         | 0         | 0         | 0         | 0         | 0         | 0         | 0         | 0         | 0         | 0         | 0 |
| Proteobacteria | Salinicola                      | 0         | 0         | 0         | 0         | 0         | 0         | 0         | 0         | 0         | 0         | 0         | 0         | 0         | 0         | 0         | 0         | 0         | 0         | 0 |
| Proteobacteria | Marinomonas                     | 0         | 0         | 0         | 0         | 0         | 0         | 0         | 0         | 0         | 0         | 0         | 0         | 0         | 0         | 0         | 0         | 0         | 0         | 0 |
| Proteobacteria | Acinetobacter                   | 0         | 0         | 0         | 0         | 0         | 0         | 0         | 0         | 0         | 0         | 0         | 0         | 0         | 0         | 0         | 0         | 0         | 0         | 0 |
| Proteobacteria | Psychrobacter                   | 0         | 0         | 0         | 0         | 0         | 0         | 0         | 0         | 0         | 0         | 0         | 0         | 0         | 0         | 0         | 0         | 0         | 0         | 0 |
| Proteobacteria | Pseudomonas                     | 0         | 0         | 0         | 0         | 0         | 0         | 0         | 0         | 0         | 0         | 0         | 0         | 0         | 0         | 0         | 0         | 0         | 0         | 0 |
| Other          | Other                           | 0         | 9         | 3         | 2         | 11        | 16        | 2         | 0         | 0         | 17        | 2         | 6         | 0         | 9         | 3         | 1         | 14        | 13        | 0 |

A subsampling of 40,00 reads per sample was performed without replacement.

| B1-core-1 | B1-core-2 | B1-core-3 | B1-rind-1 | B1-rind-2 | B1-rind-3 | B2-core-1 | B2-core-2 | B2-core-3 | B2-rind-1 | B2-rind-2 | B2-rind-3 | C-core-1 | C-core-2 | C-core-3 | C-rind-1 | C-rind-2 | C-rind-3 | D-core-1 | D-core-2 | D-core-3 | D-rind-1 | D-rind-2 | D-rind-3 |
|-----------|-----------|-----------|-----------|-----------|-----------|-----------|-----------|-----------|-----------|-----------|-----------|----------|----------|----------|----------|----------|----------|----------|----------|----------|----------|----------|----------|
| 0         | 0         | 0         | 0         | 0         | 0         | 0         | 0         | 0         | 0         | 0         | 0         | 0        | 0        | 0        | 2        | 1        | 0        | 0        | 0        | 0        | 0        | 0        | 0        |
| 1         | 0         | 0         | 5         | 0         | 0         | 0         | 0         | 0         | 0         | 0         | 0         | 0        | 0        | 0        | 0        | 0        | 0        | 9        | 0        | 0        | 0        | 14       | 0        |
| 0         | 0         | 0         | 0         | 0         | 0         | 0         | 0         | 0         | 0         | 0         | 0         | 0        | 0        | 0        | 0        | 0        | 1        | 0        | 0        | 0        | 0        | 0        | 0        |
| 66        | 0         | 0         | 3548      | 605       | 183       | 0         | 0         | 3         | 821       | 0         | 1352      | 0        | 1        | 6        | 5644     | 3051     | 427      | 84       | 0        | 28       | 4732     | 2103     | 98       |
| 23        | 0         | 0         | 37        | 1         | 4         | 0         | 0         | 0         | 1654      | 3         | 43        | 0        | 0        | 0        | 419      | 1647     | 388      | 0        | 0        | 12       | 1077     | 608      | 11       |
| 0         | 0         | 0         | 0         | 0         | 0         | 0         | 0         | 0         | 0         | 0         | 0         | 0        | 0        | 0        | 0        | 174      | 0        | 0        | 0        | 0        | 0        | 0        | 0        |
| 0         | 0         | 0         | 0         | 0         | 0         | 0         | 0         | 0         | 0         | 0         | 0         | 0        | 0        | 0        | 5        | 668      | 57       | 0        | 0        | 0        | 0        | 0        | 0        |
| 0         | 0         | 0         | 0         | 0         | 0         | 0         | 0         | 0         | 0         | 0         | 0         | 0        | 0        | 0        | 0        | 84       | 0        | 0        | 0        | 0        | 0        | 0        | 0        |
| 0         | 0         | 0         | 0         | 3         | 0         | 0         | 0         | 0         | 0         | 0         | 0         | 0        | 0        | 0        | 0        | 0        | 0        | 0        | 0        | 0        | 0        | 0        | 0        |
| 0         | 0         | 0         | 0         | 0         | 0         | 0         | 0         | 0         | 0         | 0         | 0         | 0        | 0        | 0        | 0        | 2        | 0        | 0        | 0        | 0        | 0        | 0        | 0        |
| 0         | 0         | 0         | 0         | 0         | 0         | 0         | 0         | 0         | 34        | 0         | 0         | 0        | 0        | 0        | 0        | 0        | 0        | 0        | 0        | 0        | 0        | 0        | 0        |
| 0         | 0         | 0         | 0         | 0         | 0         | 0         | 0         | 0         | 9         | 0         | 0         | 61       | 0        | 55       | 2840     | 10159    | 862      | 0        | 0        | 22       | 497      | 875      | 64       |
| 0         | 0         | 0         | 0         | 0         | 0         | 0         | 0         | 0         | 0         | 0         | 0         | 0        | 0        | 0        | 0        | 2        | 0        | 0        | 0        | 0        | 0        | 0        | 0        |
| 0         | 0         | 0         | 0         | 0         | 0         | 0         | 0         | 0         | 0         | 0         | 0         | 0        | 0        | 0        | 39       | 60       | 78       | 30       | 2        | 26       | 455      | 2807     | 20       |
| 0         | 0         | 0         | 0         | 0         | 0         | 0         | 0         | 0         | 0         | 0         | 0         | 0        | 0        | 0        | 0        | 0        | 5        | 0        | 0        | 0        | 0        | 0        | 0        |
| 0         | 0         | 0         | 0         | 0         | 0         | 0         | 0         | 0         | 0         | 0         | 0         | 0        | 0        | 0        | 0        | 0        | 17       | 0        | 0        | 0        | 0        | 0        | 0        |
| 0         | 0         | 0         | 0         | 0         | 0         | 0         | 0         | 0         | 0         | 0         | 0         | 0        | 0        | 0        | 0        | 0        | 0        | 0        | 0        | 0        | 3        | 0        | 0        |
| 0         | 0         | 0         | 0         | 0         | 0         | 0         | 0         | 0         | 0         | 0         | 0         | 0        | 0        | 0        | 12       | 0        | 0        | 0        | 0        | 0        | 0        | 0        | 0        |
| 0         | 0         | 0         | 0         | 0         | 0         | 0         | 0         | 35        | 0         | 0         | 21        | 0        | 0        | 0        | 0        | 0        | 0        | 0        | 0        | 0        | 0        | 0        | 0        |
| 0         | 0         | 0         | 0         | 0         | 0         | 0         | 0         | 0         | 0         | 0         | 0         | 0        | 0        | 0        | 0        | 0        | 0        | 0        | 0        | 4        | 0        | 0        | 6        |
| 0         | 0         | 0         | 0         | 0         | 0         | 0         | 0         | 0         | 0         | 0         | 0         | 0        | 0        | 0        | 0        | 0        | 0        | 0        | 0        | 0        | 0        | 6        | 0        |
| 0         | 0         | 0         | 0         | 4         | 12        | 0         | 0         | 0         | 0         | 0         | 0         | 0        | 0        | 0        | 0        | 0        | 0        | 0        | 0        | 0        | 0        | 0        | 0        |
| 0         | 0         | 0         | 0         | 0         | 0         | 0         | 0         | 0         | 0         | 0         | 0         | 0        | 0        | 0        | 0        | 0        | 0        | 0        | 0        | 0        | 0        | 0        | 0        |
| 0         | 0         | 0         | 0         | 0         | 0         | 0         | 0         | 0         | 0         | 0         | 0         | 0        | 0        | 0        | 0        | 0        | 0        | 0        | 0        | 0        | 0        | 14       | 17       |
| 0         | 0         | 0         | 0         | 0         | 0         | 0         | 0         | 0         | 0         | 0         | 0         | 3        | 0        | 0        | 0        | 22       | 6        | 0        | 0        | 0        | 14       | 145      | 40       |
| 20        | 6         | 3         | 3         | 0         | 7         | 39        | 10        | 10        | 1         | 3         | 2         | 33       | 0        | 11       | 698      | 844      | 235      | 643      | 6        | 18       | 2614     | 1981     | 242      |
| 1         | 0         | 0         | 0         | 0         | 0         | 0         | 0         | 0         | 0         | 0         | 0         | 0        | 0        | 0        | 0        | 0        | 0        | 0        | 0        | 0        | 0        | 0        | 0        |
| 0         | 0         | 0         | 0         | 0         | 0         | 0         | 0         | 0         | 0         | 0         | 0         | 0        | 0        | 0        | 0        | 0        | 0        | 0        | 0        | 0        | 8        | 0        | 0        |
| 0         | 0         | 0         | 0         | 0         | 0         | 0         | 0         | 0         | 0         | 0         | 0         | 83       | 5        | 0        | 8145     | 22       | 127      | 0        | 0        | 0        | 46       | 0        | 0        |
| 0         | 0         | 0         | 0         | 23        | 2         | 0         | 0         | 0         | 0         | 0         | 0         | 0        | 0        | 0        | 0        | 0        | 0        | 0        | 0        | 0        | 0        | 0        | 0        |
| 0         | 0         | 0         | 0         | 0         | 0         | 0         | 0         | 0         | 0         | 0         | 0         | 105      | 166      | 1        | 2339     | 1938     | 3700     | 0        | 0        | 0        | 0        | 0        | 0        |
| 0         | 0         | 0         | 0         | 0         | 0         | 0         | 0         | 0         | 0         | 0         | 0         | 0        | 0        | 0        | 0        | 110      | 48       | 0        | 0        | 0        | 0        | 0        | 0        |
| 1212      | 3508      | 4153      | 2190      | 2525      | 3636      | 2144      | 4457      | 3102      | 2200      | 3249      | 3046      | 3685     | 5153     | 6396     | 1922     | 863      | 3263     | 3175     | 1128     | 1564     | 8552     | 2206     | 2935     |
| 35        | 3         | 18        | 65        | 8         | 20        | 15        | 7         | 2         | 36        | 13        | 25        | 787      | 1478     | 733      | 2519     | 2033     | 2661     | 26       | 0        | 0        | 106      | 6        | 3        |
| 0         | 0         | 0         | 0         | 0         | 0         | 0         | 0         | 0         | 0         | 0         | 0         | 0        | 0        | 0        | 11       | 0        | 0        | 0        | 0        | 0        | 0        | 0        | 0        |
| 19048     | 21418     | 20168     | 6422      | 17129     | 19422     | 20521     | 22969     | 20374     | 6393      | 23461     | 15645     | 34020    | 30453    | 32739    | 11279    | 11745    | 26271    | 35937    | 38773    | 38143    | 3859     | 22767    | 18374    |
| 11407     | 14970     | 12147     | 8213      | 12747     | 12687     | 14565     | 12371     | 12009     | 12382     | 13062     | 8671      | 51       | 0        | 7        | 32       | 354      | 61       | 0        | 0        | 0        | 0        | 7        | 0        |
| 0         | 0         | 0         | 0         | 0         | 0         | 0         | 0         | 0         | 0         | 0         | 0         | 0        | 0        | 2        | 0        | 0        | 0        | 0        | 0        | 0        | 0        | 0        | 0        |
| 0         | 0         | 2         | 0         | 0         | 0         | 0         | 0         | 0         | 0         | 0         | 0         | 0        | 0        | 0        | 0        | 0        | 0        | 0        | 0        | 0        | 0        | 0        | 0        |
| 0         | 0         | 0         | 0         | 0         | 0         | 0         | 0         | 0         | 0         | 0         | 0         | 0        | 0        | 0        | 1        | 0        | 0        | 0        | 0        | 0        | 0        | 0        | 2        |
| 0         | 0         | 0         | 0         | 0         | 0         | 0         | 0         | 0         | 0         | 0         | 0         | 0        | 0        | 0        | 0        | 0        | 0        | 0        | 0        | 0        | 0        | 0        | 0        |
| 0         | 0         | 0         | 0         | 0         | 0         | 0         | 0         | 0         | 0         | 0         | 0         | 0        | 0        | 0        | 0        | 0        | 0        | 0        | 0        | 0        | 0        | 0        | 0        |
| 0         | 0         | 0         | 0         | 0         | 0         | 0         | 0         | 0         | 0         | 0         | 0         | 0        | 0        | 0        | 0        | 0        | 0        | 0        | 0        | 0        | 0        | 0        | 0        |
| 0         | 0         | 0         | 0         | 0         | 0         | 0         | 0         | 0         | 0         | 0         | 0         | 22       | 0        | 0        | 0        | 0        | 0        | 0        | 0        | 0        | 0        | 0        | 0        |
| 0         | 0         | 0         | 0         | 0         | 0         | 0         | 0         | 0         | 0         | 0         | 0         | 0        | 0        | 0        | 0        | 0        | 0        | 0        | 0        | 0        | 12035    | 8        | 7        |
| 6024      | 0         | 226       | 7066      | 2215      | 1269      | 27        | 0         | 206       | 2881      | 160       | 2507      | 0        | 0        | 0        | 0        | 0        | 0        | 0        | 0        | 62       | 1721     | 3816     | 18044    |
| 0         | 0         | 0         | 0         | 0         | 0         | 0         | 0         | 0         | 0         | 0         | 0         | 0        | 0        | 0        | 0        | 0        | 3        | 0        | 0        | 0        | 0        | 0        | 0        |
| 0         | 0         | 0         | 0         | 0         | 0         | 0         | 0         | 0         | 0         | 0         | 0         | 0        | 0        | 0        | 0        | 0        | 0        | 0        | 0        | 0        | 0        | 0        | 0        |
| 0         | 0         | 0         | 0         | 0         | 0         | 0         | 0         | 0         | 0         | 0         | 0         | 0        | 0        | 0        | 0        | 0        | 0        | 0        | 0        | 0        | 2        | 0        | 0        |
| 0         | 0         | 0         | 0         | 0         | 0         | 0         | 0         | 0         | 0         | 0         | 0         | 0        | 0        | 0        | 0        | 78       | 0        | 0        | 0        | 0        | 0        | 0        | 0        |
| 0         | 0         | 0         | 0         | 0         | 0         | 0         | 0         | 0         | 0         | 0         | 0         | 26       | 0        | 0        | 0        | 0        | 0        | 0        | 0        | 0        | 0        | 0        | 0        |
| 1812      | 90        | 3225      | 10229     | 1300      | 1461      | 2606      | 181       | 4188      | 3309      | 25        | 7289      | 1103     | 2712     | 35       | 1779     | 2243     | 1314     | 28       | 89       | 99       | 9        | 21       | 15       |
| 12        | 0         | 0         | 0         | 0         | 0         | 0         | 0         | 0         | 0         | 0         | 2         | 0        | 0        | 0        | 0        | 0        | 0        | 0        | 0        | 0        | 0        | 0        | 0        |
| 0         | 0         | 0         | 0         | 0         | 0         | 0         | 0         | 0         | 0         | 0         | 0         | 27       | 0        | 0        | 4        | 25       | 0        | 0        | 0        | 0        | 0        | 0        | 0        |
| 2         | 0         | 55        | 753       | 3268      | 1230      | 0         | 0         | 0         | 1972      | 22        | 1106      | 0        | 0        | 0        | 0        | 0        | 0        | 0        | 0        | 0        | 0        | 7        | 0        |
| 24        | 0         | 2         | 133       | 15        | 42        | 3         | 0         | 0         | 346       | 0         | 81        | 0        | 0        | 2        | 28       | 1990     | 3        | 3        | 0        | 7        | 84       | 27       | 40       |
| 0         | 0         | 0         | 0         | 0         | 0         | 0         | 0         | 0         | 1         | 0         | 0         | 0        | 0        | 0        | 0        | 0        | 0        | 0        | 0        | 0        | 0        | 0        | 0        |
| 3         | 0         | 0         | 916       | 6         | 0         | 0         | 0         | 71        | 0         | 0         | 172       | 0        | 0        | 0        | 0        | 0        | 0        | 0        | 0        | 0        | 0        | 0        | 0        |
| 0         | 0         | 0         | 0         | 0         | 0         | 0         | 0         | 0         | 0         | 0         | 0         | 5        | 2        | 4        | 0        | 0        | 0        | 0        | 1        | 12       | 0        | 3        | 14       |
| 310       | 0         | 0         | 418       | 140       | 8         | 80        | 0         | 0         | 7959      | 0         | 16        | 9        | 28       | 6        | 2251     | 1884     | 457      | 51       | 0        | 3        | 4147     | 2543     | 54       |
| 0         | 0         | 0         | 0         | 0         | 0         | 0         | 0         | 0         | 0         | 0         | 0         | 0        | 0        | 0        | 0        | 0        | 0        | 0        | 0        | 0        | 0        | 9        | 4        |
| 0         | 5         | 1         | 2         | 11        | 5         | 0         | 5         | 0         | 2         | 2         | 0         | 2        | 0        | 2        | 33       | 4        | 5        | 23       | 1        | 0        | 25       | 41       | 10       |

**Table S2.** Peak areas of volatile compounds detected in Japanese and French surface mold-ripened cheeses used in this study.

| Sample    | Acetic acid | Butanoic acid | 3-Methylbutanoic acid | Hexanoic acid | Isopropyl Alcohol | Ethanol  | 1-Nonanol | 2-Butanol | 2-Methyl-1-propanol | 2-Pentanol | 1-Methoxy-2-propanol | 1-Butanol | Isopentyl alcohol |
|-----------|-------------|---------------|-----------------------|---------------|-------------------|----------|-----------|-----------|---------------------|------------|----------------------|-----------|-------------------|
| A1-core-1 | 0           | 0             | 0                     | 0             | 122752            | 2676293  | 0         | 0         | 140386              | 0          | 0                    | 0         | 650400            |
| A1-core-2 | 0           | 0             | 0                     | 0             | 242310            | 1595765  | 0         | 0         | 78463               | 0          | 0                    | 0         | 1107446           |
| A1-core-3 | 0           | 0             | 0                     | 0             | 0                 | 869173   | 0         | 0         | 97676               | 0          | 0                    | 0         | 1197326           |
| A1-rind-1 | 0           | 0             | 0                     | 0             | 2752573           | 3335869  | 0         | 0         | 391470              | 0          | 0                    | 0         | 1535132           |
| A1-rind-2 | 0           | 0             | 0                     | 0             | 675943            | 24770610 | 0         | 0         | 819419              | 0          | 0                    | 0         | 3788844           |
| A1-rind-3 | 0           | 0             | 0                     | 0             | 412120            | 13402439 | 0         | 0         | 1435928             | 0          | 0                    | 0         | 3050340           |
| A2-core-1 | 0           | 0             | 0                     | 0             | 264060            | 732094   | 0         | 0         | 0                   | 130248     | 0                    | 0         | 51482             |
| A2-core-2 | 0           | 0             | 0                     | 0             | 0                 | 1597425  | 0         | 0         | 87173               | 0          | 0                    | 0         | 847360            |
| A2-core-3 | 0           | 0             | 0                     | 0             | 0                 | 2657618  | 0         | 0         | 252159              | 0          | 0                    | 0         | 3085409           |
| A2-rind-1 | 0           | 615239        | 0                     | 700708        | 2348799           | 33650943 | 0         | 0         | 1122665             | 334792     | 0                    | 0         | 3471119           |
| A2-rind-2 | 0           | 0             | 0                     | 0             | 1202556           | 58931860 | 0         | 0         | 1728514             | 189254     | 0                    | 0         | 9298118           |
| A2-rind-3 | 0           | 0             | 0                     | 0             | 822619            | 16144805 | 0         | 0         | 1800398             | 0          | 0                    | 0         | 2289051           |
| A3-core-1 | 0           | 0             | 0                     | 0             | 1638466           | 26903193 | 0         | 0         | 1413447             | 0          | 0                    | 0         | 3176784           |
| A3-core-2 | 0           | 0             | 0                     | 0             | 835399            | 5053110  | 0         | 0         | 517167              | 0          | 0                    | 0         | 5777727           |
| A3-core-3 | 0           | 0             | 0                     | 0             | 300858            | 1520221  | 0         | 0         | 96468               | 0          | 0                    | 0         | 1396095           |
| A3-rind-1 | 0           | 0             | 0                     | 0             | 1646392           | 25925391 | 0         | 0         | 1990087             | 220729     | 0                    | 0         | 4764519           |
| A3-rind-2 | 0           | 0             | 0                     | 0             | 1395807           | 23452480 | 0         | 0         | 1267319             | 0          | 0                    | 0         | 6386651           |
| A3-rind-3 | 0           | 0             | 0                     | 0             | 0                 | 10506044 | 0         | 588270    | 1259045             | 0          | 0                    | 0         | 1288644           |
| B1-core-1 | 0           | 0             | 0                     | 0             | 1221548           | 0        | 0         | 0         | 0                   | 0          | 0                    | 0         | 417857            |
| B1-core-2 | 0           | 0             | 0                     | 0             | 334912            | 1322645  | 0         | 0         | 0                   | 0          | 0                    | 0         | 0                 |
| B1-core-3 | 409275      | 655716        | 0                     | 0             | 0                 | 689067   | 0         | 0         | 0                   | 0          | 0                    | 0         | 671185            |
| B1-rind-1 | 0           | 0             | 0                     | 0             | 586106            | 650805   | 0         | 0         | 0                   | 0          | 0                    | 0         | 835429            |
| B1-rind-2 | 0           | 0             | 0                     | 0             | 523219            | 5712048  | 0         | 0         | 0                   | 0          | 0                    | 0         | 0                 |
| B1-rind-3 | 0           | 0             | 0                     | 0             | 724351            | 0        | 871183    | 0         | 0                   | 552843     | 0                    | 0         | 0                 |
| B2-core-1 | 0           | 0             | 0                     | 0             | 1489952           | 158068   | 0         | 0         | 0                   | 90325      | 0                    | 0         | 990027            |
| B2-core-2 | 0           | 0             | 0                     | 0             | 284912            | 628054   | 0         | 0         | 0                   | 0          | 0                    | 0         | 0                 |
| B2-core-3 | 348910      | 776359        | 0                     | 305957        | 266867            | 1180314  | 0         | 0         | 0                   | 0          | 0                    | 0         | 591281            |
| B2-rind-1 | 0           | 0             | 0                     | 0             | 8912300           | 3496415  | 0         | 606381    | 0                   | 304976     | 0                    | 0         | 1398965           |
| B2-rind-2 | 0           | 0             | 0                     | 0             | 683932            | 5993481  | 0         | 0         | 154464              | 1651875    | 0                    | 0         | 862186            |
| B2-rind-3 | 0           | 0             | 0                     | 0             | 1952677           | 3005030  | 0         | 0         | 74315               | 105677     | 0                    | 0         | 360233            |
| C-core-1  | 728188      | 0             | 399239                | 0             | 3577995           | 204225   | 0         | 735677    | 0                   | 573311     | 0                    | 0         | 260022            |
| C-core-2  | 0           | 0             | 0                     | 0             | 343245            | 26121798 | 0         | 282627    | 0                   | 0          | 0                    | 0         | 0                 |
| C-core-3  | 0           | 0             | 0                     | 0             | 0                 | 28983229 | 0         | 0         | 0                   | 108849     | 50074                | 39148     | 489119            |
| C-rind-1  | 834441      | 0             | 0                     | 0             | 1034675           | 0        | 0         | 0         | 0                   | 98040      | 0                    | 0         | 1069887           |
| C-rind-2  | 0           | 0             | 0                     | 0             | 1158538           | 834420   | 0         | 0         | 0                   | 0          | 0                    | 0         | 0                 |
| C-rind-3  | 0           | 0             | 0                     | 0             | 4461248           | 650222   | 531915    | 462194    | 0                   | 1105269    | 0                    | 0         | 233593            |
| D-core-1  | 0           | 0             | 0                     | 0             | 7953056           | 3876178  | 0         | 293581    | 0                   | 3919991    | 0                    | 76610     | 1588256           |
| D-core-2  | 0           | 171719        | 0                     | 0             | 0                 | 16955931 | 0         | 0         | 0                   | 0          | 0                    | 0         | 0                 |
| D-core-3  | 0           | 0             | 0                     | 0             | 0                 | 5231686  | 0         | 0         | 0                   | 0          | 0                    | 0         | 49132             |
| D-rind-1  | 691943      | 0             | 0                     | 0             | 508665            | 0        | 0         | 0         | 0                   | 91745      | 0                    | 0         | 278259            |
| D-rind-2  | 0           | 0             | 0                     | 0             | 2001236           | 1332554  | 0         | 0         | 0                   | 0          | 0                    | 0         | 0                 |
| D-rind-3  | 0           | 0             | 0                     | 0             | 1127686           | 161362   | 131940    | 0         | 0                   | 106337     | 0                    | 0         | 0                 |



| Heptyl acetate | 6-Heptenyl acetate | Nonyl acetate | Acetone  | 2-Butanone | 2-Pentanone | Diacetyl | 3-Methyl-2-pentanone | 2-Hexanone | 5-Hexen-2-one | 2-Heptanone | 3-Octanone | 2-Octanone | Acetoin  | 2-Nonanone | 8-Nonen-2-one | 2-Decanone | 2-Undecanone | Methanethiol |
|----------------|--------------------|---------------|----------|------------|-------------|----------|----------------------|------------|---------------|-------------|------------|------------|----------|------------|---------------|------------|--------------|--------------|
| 0              | 0                  | 0             | 2381370  | 0          | 78423       | 0        | 0                    | 0          | 0             | 235964      | 0          | 0          | 0        | 268082     | 0             | 0          | 0            | 0            |
| 0              | 0                  | 0             | 2525580  | 0          | 0           | 588963   | 0                    | 0          | 0             | 64182       | 0          | 0          | 3146406  | 86304      | 0             | 0          | 0            | 0            |
| 0              | 0                  | 0             | 5432635  | 38050      | 0           | 405839   | 0                    | 0          | 0             | 0           | 0          | 0          | 1230962  | 83621      | 0             | 0          | 0            | 0            |
| 0              | 0                  | 0             | 21548333 | 85949      | 0           | 0        | 0                    | 0          | 0             | 67765       | 0          | 0          | 64616    | 0          | 0             | 0          | 0            | 126212       |
| 1200191        | 0                  | 0             | 6001453  | 109376     | 2826225     | 0        | 0                    | 75566      | 0             | 2192294     | 0          | 56763      | 400364   | 2087269    | 131265        | 0          | 0            | 0            |
| 0              | 0                  | 415826        | 3906755  | 91990      | 435055      | 0        | 0                    | 42602      | 0             | 374196      | 0          | 0          | 0        | 0          | 0             | 1341566    | 0            | 0            |
| 0              | 0                  | 0             | 662531   | 0          | 2779669     | 0        | 0                    | 112777     | 0             | 3020699     | 0          | 65945      | 60499    | 1548134    | 153606        | 0          | 0            | 0            |
| 0              | 0                  | 0             | 3081212  | 0          | 0           | 0        | 0                    | 0          | 0             | 1386430     | 0          | 0          | 6663303  | 1288741    | 0             | 0          | 0            | 0            |
| 0              | 0                  | 0             | 5420407  | 0          | 0           | 0        | 0                    | 0          | 0             | 0           | 0          | 0          | 1639555  | 0          | 0             | 0          | 0            | 0            |
| 345719         | 0                  | 0             | 12282208 | 87965      | 2764589     | 0        | 0                    | 174685     | 0             | 3710583     | 0          | 168044     | 0        | 7866219    | 521451        | 0          | 818233       | 0            |
| 2676409        | 125272             | 0             | 8145528  | 286422     | 7987038     | 0        | 0                    | 300552     | 0             | 6583431     | 0          | 228202     | 463397   | 9593765    | 0             | 0          | 1913091      | 0            |
| 0              | 0                  | 0             | 3571841  | 54039      | 0           | 0        | 0                    | 0          | 0             | 0           | 0          | 0          | 0        | 0          | 0             | 0          | 0            | 0            |
| 0              | 0                  | 0             | 13098827 | 0          | 0           | 0        | 0                    | 0          | 0             | 0           | 0          | 0          | 84284    | 0          | 0             | 0          | 0            | 0            |
| 0              | 0                  | 0             | 9914771  | 45618      | 0           | 233558   | 0                    | 0          | 0             | 97419       | 0          | 0          | 1354931  | 0          | 0             | 0          | 0            | 0            |
| 0              | 0                  | 0             | 7783410  | 99701      | 0           | 148930   | 0                    | 0          | 0             | 0           | 0          | 0          | 653607   | 0          | 0             | 0          | 0            | 0            |
| 243259         | 0                  | 0             | 11550030 | 112775     | 2938061     | 0        | 0                    | 242332     | 0             | 2980120     | 0          | 87404      | 70340    | 2983812    | 0             | 0          | 0            | 0            |
| 0              | 0                  | 0             | 12681264 | 0          | 350682      | 0        | 0                    | 0          | 0             | 229301      | 0          | 0          | 1962338  | 162615     | 0             | 0          | 0            | 0            |
| 0              | 0                  | 383250        | 2094528  | 54408      | 0           | 0        | 0                    | 0          | 1491624       | 0           | 0          | 0          | 0        | 0          | 0             | 1172416    | 0            | 0            |
| 0              | 0                  | 0             | 13810135 | 1112032    | 1337810     | 0        | 0                    | 0          | 145735        | 0           | 0          | 0          | 0        | 0          | 0             | 0          | 0            | 466282       |
| 0              | 0                  | 0             | 435536   | 0          | 0           | 1923404  | 0                    | 0          | 0             | 0           | 0          | 0          | 5408767  | 0          | 0             | 0          | 0            | 0            |
| 0              | 0                  | 0             | 1561424  | 0          | 15084709    | 0        | 0                    | 63160      | 0             | 2815275     | 0          | 0          | 49201698 | 709974     | 137672        | 0          | 0            | 0            |
| 0              | 0                  | 0             | 11462796 | 908570     | 1538285     | 0        | 0                    | 0          | 0             | 329982      | 0          | 0          | 0        | 131954     | 0             | 0          | 0            | 1529353      |
| 0              | 0                  | 0             | 3334939  | 0          | 1806559     | 0        | 0                    | 0          | 0             | 0           | 0          | 0          | 0        | 4221529    | 0             | 0          | 0            | 0            |
| 436805         | 0                  | 0             | 13574113 | 821362     | 19724330    | 0        | 0                    | 751482     | 0             | 14614987    | 170515     | 340379     | 0        | 23455191   | 3021505       | 0          | 2398297      | 0            |
| 0              | 0                  | 0             | 17673740 | 1262474    | 2639939     | 0        | 0                    | 0          | 0             | 643318      | 0          | 0          | 414976   | 251619     | 0             | 0          | 0            | 569214       |
| 0              | 0                  | 0             | 836442   | 0          | 3113894     | 1095629  | 0                    | 0          | 0             | 0           | 0          | 0          | 3351125  | 2968586    | 0             | 0          | 0            | 0            |
| 0              | 0                  | 0             | 872525   | 62078      | 0           | 7772997  | 0                    | 0          | 0             | 171929      | 0          | 0          | 18665609 | 71865      | 0             | 0          | 0            | 0            |
| 0              | 0                  | 0             | 37039055 | 2735383    | 4416396     | 0        | 0                    | 0          | 0             | 779552      | 0          | 0          | 286093   | 553120     | 0             | 0          | 0            | 2370164      |
| 932810         | 0                  | 0             | 5740302  | 385475     | 27843506    | 0        | 0                    | 804202     | 164545        | 22661808    | 0          | 366002     | 150197   | 17440769   | 1571827       | 0          | 797584       | 0            |
| 175393         | 0                  | 0             | 21597386 | 352132     | 5258007     | 0        | 0                    | 0          | 0             | 2001272     | 401469     | 38602      | 0        | 3133693    | 317783        | 0          | 0            | 0            |
| 0              | 0                  | 0             | 11358785 | 1962802    | 4075703     | 0        | 0                    | 0          | 0             | 1221755     | 0          | 0          | 0        | 0          | 0             | 0          | 0            | 0            |
| 0              | 0                  | 0             | 315794   | 232136     | 0           | 0        | 0                    | 0          | 0             | 0           | 0          | 0          | 0        | 0          | 0             | 0          | 0            | 0            |
| 0              | 0                  | 0             | 635615   | 212180     | 1040151     | 0        | 0                    | 41707      | 0             | 266055      | 0          | 0          | 120151   | 0          | 0             | 0          | 0            | 0            |
| 0              | 0                  | 0             | 24686080 | 5215815    | 6288626     | 0        | 932065               | 0          | 0             | 1695481     | 0          | 0          | 0        | 5398782    | 0             | 0          | 0            | 990775       |
| 0              | 0                  | 0             | 12049285 | 365811     | 735677      | 0        | 0                    | 0          | 0             | 1667238     | 0          | 0          | 0        | 3068808    | 0             | 0          | 0            | 0            |
| 219575         | 0                  | 0             | 38867277 | 3185205    | 25610177    | 0        | 0                    | 1118696    | 0             | 5901087     | 0          | 395294     | 55813    | 18546870   | 903989        | 0          | 3826039      | 0            |
| 0              | 0                  | 0             | 18822045 | 707370     | 14544251    | 0        | 0                    | 597015     | 49916         | 8104450     | 0          | 92191      | 3894255  | 596697     | 0             | 0          | 0            | 0            |
| 0              | 0                  | 0             | 2751796  | 217380     | 0           | 1636161  | 0                    | 0          | 0             | 1446390     | 0          | 0          | 0        | 824174     | 0             | 0          | 0            | 0            |
| 0              | 0                  | 0             | 2213572  | 171173     | 0           | 715134   | 0                    | 0          | 0             | 242937      | 0          | 0          | 256634   | 101762     | 0             | 0          | 0            | 0            |
| 0              | 0                  | 0             | 28376589 | 3696052    | 7929458     | 0        | 780276               | 0          | 0             | 619316      | 0          | 0          | 522858   | 0          | 0             | 0          | 419751       | 0            |
| 0              | 0                  | 687790        | 17423298 | 238120     | 0           | 0        | 0                    | 0          | 0             | 0           | 0          | 0          | 0        | 0          | 0             | 1365020    | 0            | 0            |
| 68282          | 0                  | 0             | 27793596 | 635436     | 2370028     | 0        | 0                    | 133746     | 0             | 4682997     | 23770      | 183161     | 35182    | 9553881    | 462016        | 0          | 0            | 0            |

| Dimethyl sulfide | S-Methyl thioacetate | Dimethyl disulfide | S-Methyl 3-methylbutanethioate | 2,4-Dithiapentane | Dimethyl trisulfide | 1-Heptene | 1,3-Octadiene | 2,2,4,6,6-Pentamethylheptane | Toluene | Styrene | 2,6-Dimethylpytazine |
|------------------|----------------------|--------------------|--------------------------------|-------------------|---------------------|-----------|---------------|------------------------------|---------|---------|----------------------|
| 0                | 0                    | 106848             | 0                              | 0                 | 0                   | 0         | 0             | 0                            | 0       | 0       | 0                    |
| 0                | 0                    | 0                  | 0                              | 0                 | 0                   | 0         | 0             | 0                            | 0       | 0       | 0                    |
| 0                | 0                    | 0                  | 0                              | 0                 | 0                   | 0         | 0             | 31370                        | 0       | 0       | 0                    |
| 680523           | 274096               | 5013533            | 0                              | 0                 | 336981              | 0         | 0             | 0                            | 0       | 0       | 0                    |
| 0                | 0                    | 0                  | 0                              | 0                 | 0                   | 0         | 0             | 0                            | 57505   | 0       | 0                    |
| 815094           | 0                    | 187560             | 0                              | 0                 | 0                   | 0         | 0             | 55577                        | 82229   | 0       | 0                    |
| 62603            | 0                    | 208249             | 0                              | 0                 | 0                   | 0         | 0             | 0                            | 0       | 0       | 0                    |
| 0                | 0                    | 0                  | 0                              | 0                 | 0                   | 0         | 0             | 0                            | 0       | 0       | 0                    |
| 0                | 0                    | 99942              | 0                              | 0                 | 0                   | 0         | 0             | 24625                        | 0       | 0       | 0                    |
| 89616            | 0                    | 82601              | 0                              | 0                 | 0                   | 411540    | 0             | 0                            | 0       | 172867  | 0                    |
| 0                | 0                    | 0                  | 0                              | 0                 | 0                   | 0         | 0             | 0                            | 67223   | 0       | 0                    |
| 501057           | 0                    | 0                  | 0                              | 0                 | 0                   | 0         | 0             | 0                            | 0       | 0       | 0                    |
| 205528           | 0                    | 0                  | 0                              | 0                 | 0                   | 0         | 0             | 0                            | 0       | 0       | 0                    |
| 0                | 0                    | 0                  | 0                              | 0                 | 0                   | 0         | 0             | 0                            | 0       | 0       | 0                    |
| 0                | 0                    | 0                  | 0                              | 0                 | 0                   | 0         | 0             | 34427                        | 0       | 0       | 0                    |
| 262907           | 0                    | 108965             | 0                              | 0                 | 94811               | 0         | 0             | 0                            | 0       | 0       | 0                    |
| 0                | 0                    | 0                  | 0                              | 0                 | 0                   | 0         | 0             | 39325                        | 0       | 0       | 0                    |
| 142403           | 0                    | 0                  | 0                              | 0                 | 0                   | 0         | 0             | 0                            | 0       | 0       | 0                    |
| 13404273         | 127812               | 39557094           | 0                              | 716324            | 779796              | 0         | 0             | 0                            | 0       | 0       | 0                    |
| 1117263          | 0                    | 2074189            | 0                              | 0                 | 0                   | 0         | 0             | 0                            | 0       | 0       | 0                    |
| 229209           | 0                    | 227475             | 0                              | 0                 | 0                   | 0         | 0             | 0                            | 122267  | 0       | 0                    |
| 6412635          | 776603               | 37658995           | 138813                         | 827068            | 5915291             | 0         | 0             | 0                            | 0       | 0       | 0                    |
| 3672301          | 164205               | 7899379            | 0                              | 0                 | 0                   | 0         | 0             | 0                            | 0       | 0       | 0                    |
| 1340908          | 0                    | 312500             | 0                              | 0                 | 0                   | 807883    | 0             | 0                            | 136127  | 243527  | 0                    |
| 10044884         | 232688               | 43665836           | 0                              | 213108            | 1017372             | 0         | 0             | 0                            | 0       | 0       | 0                    |
| 263520           | 0                    | 294940             | 0                              | 0                 | 0                   | 0         | 0             | 0                            | 0       | 0       | 0                    |
| 5932745          | 172378               | 2726484            | 0                              | 0                 | 0                   | 0         | 0             | 0                            | 184148  | 0       | 0                    |
| 9224858          | 2705670              | 48103065           | 117019                         | 367737            | 3382378             | 0         | 0             | 0                            | 0       | 0       | 123919               |
| 397209           | 0                    | 1543593            | 0                              | 0                 | 0                   | 90878     | 0             | 0                            | 147695  | 764207  | 0                    |
| 17583506         | 221065               | 11380944           | 0                              | 336178            | 316695              | 0         | 92069         | 0                            | 119652  | 0       | 0                    |
| 866235           | 0                    | 4433678            | 0                              | 0                 | 515555              | 0         | 0             | 0                            | 0       | 0       | 0                    |
| 692744           | 0                    | 6399119            | 0                              | 0                 | 0                   | 0         | 0             | 0                            | 0       | 0       | 0                    |
| 397080           | 0                    | 375395             | 0                              | 0                 | 0                   | 0         | 0             | 0                            | 25066   | 0       | 0                    |
| 963750           | 0                    | 23966189           | 0                              | 0                 | 1057335             | 0         | 0             | 0                            | 0       | 0       | 0                    |
| 385177           | 0                    | 5652811            | 0                              | 0                 | 511981              | 0         | 0             | 0                            | 0       | 0       | 0                    |
| 372195           | 0                    | 164182             | 0                              | 0                 | 0                   | 122131    | 0             | 0                            | 0       | 0       | 0                    |
| 256473           | 0                    | 212533             | 0                              | 0                 | 172303              | 0         | 0             | 0                            | 0       | 0       | 0                    |
| 35010            | 0                    | 0                  | 0                              | 0                 | 0                   | 0         | 0             | 0                            | 0       | 0       | 0                    |
| 284081           | 0                    | 0                  | 0                              | 44385             | 0                   | 0         | 0             | 0                            | 26534   | 0       | 0                    |
| 212427           | 0                    | 11880858           | 0                              | 0                 | 0                   | 0         | 0             | 0                            | 0       | 0       | 0                    |
| 51118            | 0                    | 0                  | 0                              | 0                 | 0                   | 0         | 0             | 0                            | 0       | 0       | 0                    |
| 853946           | 0                    | 579345             | 0                              | 0                 | 151827              | 0         | 0             | 0                            | 61213   | 120095  | 0                    |

**Table S3.** The loadings for the components PC1–PC5 of the principal component analysis performed on the surface-mold ripened cheeses.

| Compounds                      | Category        | PC1    | PC2    | PC3    | PC4    | PC5    |
|--------------------------------|-----------------|--------|--------|--------|--------|--------|
| Acetic acid                    | Acid            | -0.124 | 0.092  | -0.157 | -0.094 | 0.015  |
| Butanoic acid                  | Acid            | 0.007  | -0.141 | -0.042 | 0.270  | 0.704  |
| 3-Methylbutanoic acid          | Acid            | -0.058 | 0.062  | -0.074 | -0.177 | -0.076 |
| Hexanoic acid                  | Acid            | 0.117  | -0.084 | 0.061  | 0.152  | 0.499  |
| Isopropyl Alcohol              | Alcohol         | 0.187  | 0.714  | 0.052  | -0.324 | 0.053  |
| Ethanol                        | Alcohol         | 0.308  | -0.324 | 0.697  | -0.079 | 0.070  |
| 1-Nonanol                      | Alcohol         | 0.569  | 0.170  | -0.379 | 0.118  | -0.194 |
| 2-Butanol                      | Alcohol         | 0.056  | 0.488  | -0.035 | -0.390 | -0.031 |
| 2-Methyl-1-propanol            | Alcohol         | 0.158  | -0.332 | 0.537  | -0.123 | -0.112 |
| 2-Pentanol                     | Alcohol         | 0.525  | 0.235  | -0.300 | -0.356 | 0.151  |
| 1-Methoxy-2-propanol           | Alcohol         | -0.054 | -0.103 | -0.008 | -0.072 | 0.179  |
| 1-Butanol                      | Alcohol         | 0.137  | 0.055  | -0.175 | -0.358 | 0.201  |
| Isopentyl alcohol              | Alcohol         | 0.250  | -0.239 | 0.713  | -0.144 | -0.077 |
| 2-Hexanol                      | Alcohol         | 0.609  | 0.224  | -0.377 | -0.383 | 0.054  |
| 2-Heptanol                     | Alcohol         | 0.818  | 0.069  | -0.068 | -0.081 | 0.184  |
| 1-Octen-3-ol                   | Alcohol         | 0.000  | 0.115  | -0.050 | 0.719  | -0.357 |
| 2-Ethylhexanol                 | Alcohol         | 0.415  | 0.215  | -0.259 | -0.260 | -0.259 |
| 2-Nonanol                      | Alcohol         | 0.752  | 0.094  | 0.114  | -0.168 | -0.059 |
| 2-Methylbutanal                | Aldehyde        | -0.158 | 0.411  | 0.172  | -0.023 | 0.010  |
| 3-Methylbutanal                | Aldehyde        | -0.191 | -0.104 | 0.023  | -0.162 | -0.074 |
| Ethyl Acetate                  | Ester           | -0.208 | 0.122  | 0.023  | 0.154  | 0.589  |
| Propyl acetate                 | Ester           | 0.759  | -0.097 | 0.578  | 0.183  | -0.084 |
| Ethyl butanoate                | Ester           | 0.210  | 0.462  | 0.734  | -0.039 | 0.215  |
| Isopropyl butyrate             | Ester           | -0.127 | 0.777  | 0.295  | -0.077 | 0.238  |
| Butyl acetate                  | Ester           | 0.453  | -0.153 | 0.785  | 0.019  | -0.086 |
| Pentyl acetate                 | Ester           | 0.671  | -0.172 | 0.643  | 0.088  | 0.069  |
| Ethyl hexanoate                | Ester           | 0.019  | -0.119 | 0.031  | -0.046 | 0.286  |
| Hexyl acetate                  | Ester           | 0.453  | -0.153 | 0.785  | 0.019  | -0.086 |
| Heptyl acetate                 | Ester           | 0.680  | -0.139 | 0.635  | 0.100  | -0.020 |
| 6-Heptenyl acetate             | Ester           | 0.453  | -0.153 | 0.785  | 0.019  | -0.086 |
| Nonyl acetate                  | Ester           | -0.113 | -0.140 | 0.028  | -0.123 | -0.141 |
| Acetone                        | Ketone          | 0.207  | 0.691  | -0.067 | -0.118 | -0.351 |
| 2-Butanone                     | Ketone          | 0.095  | 0.598  | -0.126 | -0.228 | -0.265 |
| 2-Pentanone                    | Ketone          | 0.824  | 0.277  | -0.339 | -0.031 | 0.037  |
| Diacetyl                       | Ketone          | -0.135 | -0.131 | -0.076 | 0.270  | 0.607  |
| 3-Methyl-2-pentanone           | Ketone          | -0.080 | 0.131  | -0.096 | -0.129 | -0.225 |
| 2-Hexanone                     | Ketone          | 0.892  | 0.176  | -0.311 | -0.154 | -0.017 |
| 5-Hexen-2-one                  | Ketone          | 0.537  | 0.068  | -0.242 | -0.066 | 0.280  |
| 2-Heptanone                    | Ketone          | 0.865  | 0.100  | -0.231 | 0.078  | 0.149  |
| 3-Octanone                     | Ketone          | 0.161  | 0.133  | -0.158 | 0.784  | -0.358 |
| 2-Octanone                     | Ketone          | 0.948  | 0.113  | -0.144 | 0.028  | -0.026 |
| Acetoin                        | Ketone          | -0.072 | -0.132 | -0.117 | 0.170  | 0.492  |
| 2-Nonanone                     | Ketone          | 0.876  | 0.134  | -0.217 | 0.145  | -0.075 |
| 8-Nonen-2-one                  | Ketone          | 0.713  | 0.122  | -0.393 | 0.285  | 0.008  |
| 2-Decanone                     | Ketone          | -0.111 | -0.155 | 0.047  | -0.127 | -0.145 |
| 2-Undecanone                   | Ketone          | 0.808  | 0.142  | -0.051 | -0.047 | -0.191 |
| Methanethiol                   | Sulfur compound | -0.228 | 0.872  | 0.265  | -0.009 | 0.095  |
| Dimethyl sulfide               | Sulfur compound | -0.181 | 0.544  | 0.058  | 0.637  | -0.123 |
| S-Methyl thioacetate           | Sulfur compound | -0.188 | 0.857  | 0.302  | 0.036  | 0.215  |
| Dimethyl disulfide             | Sulfur compound | -0.277 | 0.784  | 0.171  | 0.141  | -0.059 |
| S-Methyl 3-methylbutanethioate | Sulfur compound | -0.188 | 0.748  | 0.260  | 0.036  | 0.142  |
| 2,4-Dithiapentane              | Sulfur compound | -0.219 | 0.599  | 0.146  | 0.338  | -0.113 |
| Dimethyl trisulfide            | Sulfur compound | -0.223 | 0.725  | 0.200  | 0.072  | 0.029  |
| 1-Heptene                      | Other           | 0.539  | 0.065  | -0.254 | 0.250  | 0.067  |
| 1,3-Octadiene                  | Other           | 0.000  | 0.115  | -0.050 | 0.719  | -0.357 |
| 2,2,4,6,6-Pentamethylheptane   | Other           | -0.141 | -0.230 | 0.087  | -0.118 | -0.148 |
| Toluene                        | Other           | 0.443  | -0.083 | -0.100 | 0.613  | 0.366  |
| Styrene                        | Other           | 0.633  | 0.042  | -0.257 | 0.141  | 0.271  |
| 2,6-Dimethylpyrazine           | Other           | -0.127 | 0.777  | 0.295  | -0.077 | 0.238  |

Volatile compounds data of Japanese and French surface-mold ripened cheeses are used for principal component analysis.

**Table S4.** Composition of the medium used in this study

| Medium      | PCAM (+ NaCl)    |                | PCAM + V + CV (+NaCl) |           | Funke (+ NaCl)  |         | MB (+ Glucose)  |          | Artificial Seawater medium    |                                       | BIP5 (+ NaCl)   |                 | TSB (+ NaCl)      |           |
|-------------|------------------|----------------|-----------------------|-----------|-----------------|---------|-----------------|----------|-------------------------------|---------------------------------------|-----------------|-----------------|-------------------|-----------|
| Composition | Plate Count Agar | 23.5 g         | Plate Count Agar      | 23.5 g    | Peptone         | 10 g    | Marine Broth    | 37.4 g   | Yeast Extract                 | 20 g                                  | Tryptone        | 10 g            | Tryptic Soy Broth | 30 g      |
|             | Skim milk        | 10 g           | Skim milk             | 10 g      | Yeast extract   | 5 g     | Glucose         | 0 or 2 g | Casein, from milk             | 30 g                                  | Fish extract    | 50 g            | Yeast extract     | 2.5 g     |
|             | NaCl             | 0 or 30 g      | NaCl                  | 0 or 30 g | Malt extract    | 5 g     | Agar            | 15 g     | Agar                          | 15 g                                  | NaCl            | 0 or 25 or 50 g | NaCl              | 0 or 30 g |
|             |                  |                | Vancomycin            | * 5 mg    | Casamino acid   | 5 g     |                 |          |                               |                                       | KCl             | 1 g             |                   |           |
|             |                  | Crystal violet | * 5 mg                | Tween 80  | 10 g            |         |                 |          |                               | MgSO <sub>4</sub> · 7H <sub>2</sub> O | 2.5 g           |                 |                   |           |
|             |                  |                |                       | NaCl      | 0 or 30 g       |         |                 |          |                               |                                       |                 |                 |                   |           |
|             |                  |                |                       | Agar      | 15 g            |         |                 |          |                               |                                       |                 |                 |                   |           |
|             | Distilled water  | 1000 ml        | Distilled water       | 1000 ml   | Distilled water | 1000 ml | Distilled water | 1000 ml  | Distilled artificial seawater | 1000 ml                               | Distilled water | 1000 ml         | Distilled water   | 1000 ml   |

Autoclave at 121° C.

\* - Dissolved in distilled water and sterilized by filtration through a membrane with a 0.2 µm pore size. This solution was added to medium after autoclave.



Table S5. Peak areas of volatile compounds detected in cheeses inoculated with bacterial isolates.

| Sample       | Acetic acid | Propanoic acid | Butanoic acid | 2-Methylpropanoic acid | 3-Methylbutanoic acid | 2-Methylbutanoic acid | Hexanoic acid | Octanoic acid | Ethanol  | 2-Methyl-1-propanol | Isopentyl alcohol | Isopropyl Alcohol | 1-Butanol | 2-Heptanol | 1-Methoxy-2-propanol |
|--------------|-------------|----------------|---------------|------------------------|-----------------------|-----------------------|---------------|---------------|----------|---------------------|-------------------|-------------------|-----------|------------|----------------------|
| Control-0-1  | 136164      | 0              | 0             | 0                      | 0                     | 0                     | 0             | 0             | 7002428  | 124597              | 245091            | 288559            | 0         | 0          | 0                    |
| Control-0-2  | 0           | 0              | 0             | 0                      | 0                     | 0                     | 0             | 0             | 34839441 | 397831              | 1149325           | 0                 | 76946     | 0          | 29297                |
| Control-0-3  | 0           | 0              | 0             | 0                      | 0                     | 0                     | 0             | 0             | 30865355 | 208972              | 1148078           | 0                 | 78928     | 0          | 78505                |
| Control-7-1  | 0           | 0              | 0             | 0                      | 0                     | 0                     | 0             | 0             | 28417740 | 0                   | 173278            | 174838            | 0         | 0          | 0                    |
| Control-7-2  | 0           | 0              | 0             | 0                      | 0                     | 0                     | 0             | 0             | 29676626 | 0                   | 195225            | 329807            | 0         | 0          | 0                    |
| Control-7-3  | 0           | 0              | 0             | 0                      | 0                     | 0                     | 0             | 0             | 25754877 | 0                   | 142372            | 205075            | 0         | 0          | 0                    |
| Control-14-1 | 0           | 0              | 0             | 0                      | 0                     | 0                     | 0             | 0             | 33496709 | 0                   | 84193             | 365720            | 0         | 0          | 0                    |
| Control-14-2 | 0           | 0              | 0             | 0                      | 0                     | 0                     | 0             | 0             | 33965762 | 0                   | 76139             | 516407            | 0         | 0          | 0                    |
| Control-14-3 | 0           | 0              | 0             | 0                      | 0                     | 0                     | 0             | 0             | 28067350 | 0                   | 61942             | 389186            | 0         | 0          | 0                    |
| Control-21-1 | 337313      | 0              | 0             | 0                      | 0                     | 0                     | 0             | 0             | 21221864 | 0                   | 0                 | 0                 | 0         | 0          | 0                    |
| Control-21-2 | 0           | 0              | 0             | 0                      | 0                     | 0                     | 0             | 0             | 35389329 | 0                   | 0                 | 195518            | 0         | 0          | 0                    |
| Control-21-3 | 0           | 0              | 0             | 0                      | 0                     | 0                     | 0             | 0             | 27774313 | 0                   | 0                 | 303368            | 0         | 0          | 0                    |
| Car-0-1      | 0           | 0              | 0             | 0                      | 0                     | 0                     | 0             | 0             | 47671053 | 187410              | 584388            | 0                 | 0         | 0          | 0                    |
| Car-0-2      | 0           | 0              | 0             | 0                      | 0                     | 0                     | 0             | 0             | 45526839 | 217511              | 832332            | 0                 | 92682     | 0          | 79133                |
| Car-0-3      | 0           | 0              | 0             | 0                      | 0                     | 0                     | 0             | 0             | 59537034 | 236846              | 777517            | 0                 | 0         | 0          | 0                    |
| Car-7-1      | 0           | 0              | 144308        | 0                      | 402261                | 0                     | 0             | 0             | 117269   | 0                   | 52105             | 0                 | 0         | 0          | 0                    |
| Car-7-2      | 0           | 0              | 0             | 0                      | 1036341               | 0                     | 0             | 0             | 74619    | 0                   | 121453            | 0                 | 0         | 0          | 0                    |
| Car-7-3      | 0           | 0              | 108821        | 0                      | 2279652               | 0                     | 0             | 0             | 83708    | 0                   | 61589             | 0                 | 0         | 0          | 0                    |
| Car-14-1     | 0           | 0              | 172585        | 0                      | 1364074               | 0                     | 0             | 0             | 246624   | 0                   | 0                 | 0                 | 0         | 0          | 0                    |
| Car-14-2     | 0           | 0              | 284333        | 0                      | 2440558               | 0                     | 0             | 0             | 315141   | 0                   | 0                 | 0                 | 0         | 0          | 0                    |
| Car-14-3     | 0           | 0              | 545083        | 92908                  | 4209644               | 0                     | 0             | 0             | 626126   | 0                   | 0                 | 0                 | 0         | 0          | 0                    |
| Car-21-1     | 0           | 0              | 1577567       | 151437                 | 3558881               | 0                     | 0             | 0             | 320066   | 0                   | 0                 | 0                 | 0         | 0          | 0                    |
| Car-21-2     | 0           | 0              | 686770        | 155625                 | 2158046               | 0                     | 0             | 0             | 505730   | 0                   | 0                 | 0                 | 0         | 0          | 0                    |
| Car-21-3     | 0           | 84328          | 1392326       | 213006                 | 4939336               | 0                     | 0             | 0             | 435241   | 0                   | 0                 | 0                 | 0         | 0          | 0                    |
| Ent-0-1      | 252085      | 0              | 0             | 0                      | 0                     | 0                     | 0             | 0             | 2722467  | 694871              | 0                 | 0                 | 0         | 0          | 0                    |
| Ent-0-2      | 790125      | 0              | 0             | 0                      | 0                     | 0                     | 0             | 0             | 1915640  | 644787              | 0                 | 105995            | 0         | 0          | 0                    |
| Ent-0-3      | 988709      | 0              | 0             | 0                      | 0                     | 0                     | 0             | 0             | 2879411  | 187221              | 553254            | 0                 | 234218    | 0          | 0                    |
| Ent-7-1      | 1631483     | 0              | 0             | 0                      | 0                     | 0                     | 0             | 0             | 2149215  | 0                   | 0                 | 0                 | 0         | 0          | 174354               |
| Ent-7-2      | 1344150     | 0              | 0             | 0                      | 0                     | 0                     | 0             | 0             | 2377119  | 0                   | 0                 | 0                 | 0         | 0          | 131730               |
| Ent-7-3      | 992968      | 0              | 0             | 0                      | 0                     | 0                     | 0             | 0             | 2220178  | 0                   | 0                 | 0                 | 0         | 0          | 206605               |
| Ent-14-1     | 7615752     | 0              | 768388        | 724763                 | 3228556               | 0                     | 0             | 0             | 2109932  | 0                   | 0                 | 0                 | 0         | 0          | 0                    |
| Ent-14-2     | 40400762    | 0              | 5004026       | 4805022                | 21984431              | 0                     | 0             | 0             | 2372063  | 0                   | 0                 | 0                 | 0         | 0          | 371513               |
| Ent-14-3     | 7040154     | 0              | 599200        | 548627                 | 2968998               | 0                     | 0             | 0             | 2180313  | 0                   | 0                 | 0                 | 0         | 0          | 0                    |
| Ent-21-1     | 98488325    | 206398         | 5043253       | 11449647               | 49595553              | 0                     | 0             | 0             | 2210503  | 0                   | 0                 | 0                 | 0         | 0          | 0                    |
| Ent-21-2     | 42689823    | 0              | 1663484       | 4123819                | 19599918              | 0                     | 0             | 0             | 3188353  | 0                   | 0                 | 0                 | 0         | 0          | 0                    |
| Ent-21-3     | 102323239   | 224570         | 4671822       | 10893132               | 48714992              | 0                     | 0             | 0             | 1454083  | 0                   | 0                 | 0                 | 0         | 0          | 0                    |
| Bra-0-1      | 0           | 0              | 0             | 0                      | 0                     | 0                     | 0             | 0             | 5362932  | 0                   | 52220             | 151926            | 0         | 0          | 0                    |
| Bra-0-2      | 0           | 0              | 0             | 0                      | 0                     | 0                     | 0             | 0             | 6612821  | 0                   | 21964             | 157793            | 0         | 0          | 0                    |
| Bra-0-3      | 0           | 0              | 0             | 0                      | 0                     | 0                     | 0             | 0             | 4716945  | 0                   | 44621             | 154029            | 0         | 0          | 0                    |
| Bra-7-1      | 0           | 0              | 0             | 0                      | 0                     | 0                     | 0             | 0             | 1560677  | 0                   | 0                 | 0                 | 0         | 0          | 0                    |
| Bra-7-2      | 0           | 0              | 0             | 0                      | 0                     | 0                     | 0             | 0             | 1050363  | 0                   | 0                 | 0                 | 0         | 0          | 0                    |
| Bra-7-3      | 0           | 0              | 0             | 0                      | 0                     | 0                     | 0             | 0             | 1637142  | 0                   | 0                 | 0                 | 0         | 0          | 0                    |
| Bra-14-1     | 0           | 0              | 0             | 0                      | 0                     | 0                     | 0             | 0             | 9340494  | 0                   | 0                 | 0                 | 0         | 0          | 0                    |
| Bra-14-2     | 0           | 0              | 0             | 0                      | 0                     | 0                     | 0             | 0             | 9195586  | 0                   | 0                 | 0                 | 0         | 0          | 0                    |
| Bra-14-3     | 0           | 0              | 0             | 0                      | 0                     | 0                     | 0             | 0             | 3734546  | 0                   | 0                 | 0                 | 0         | 0          | 0                    |
| Bra-21-1     | 0           | 0              | 0             | 254282                 | 0                     | 951875                | 0             | 0             | 1022186  | 0                   | 0                 | 0                 | 0         | 0          | 0                    |
| Bra-21-2     | 0           | 0              | 0             | 0                      | 0                     | 0                     | 0             | 0             | 3105535  | 0                   | 0                 | 0                 | 0         | 0          | 0                    |
| Bra-21-3     | 0           | 0              | 0             | 0                      | 0                     | 96891                 | 0             | 0             | 1762049  | 0                   | 0                 | 0                 | 0         | 0          | 0                    |
| Bre-0-1      | 0           | 0              | 0             | 0                      | 0                     | 0                     | 0             | 0             | 6224494  | 42369               | 149002            | 150666            | 0         | 29747      | 0                    |
| Bre-0-2      | 0           | 0              | 0             | 0                      | 0                     | 0                     | 0             | 0             | 5654869  | 43739               | 140109            | 160279            | 0         | 23284      | 0                    |
| Bre-0-3      | 0           | 0              | 0             | 0                      | 0                     | 0                     | 0             | 0             | 4217552  | 77194               | 198055            | 155868            | 0         | 40511      | 0                    |
| Bre-7-1      | 0           | 0              | 0             | 0                      | 0                     | 0                     | 0             | 0             | 0        | 0                   | 0                 | 0                 | 0         | 0          | 0                    |
| Bre-7-2      | 0           | 0              | 0             | 0                      | 0                     | 0                     | 0             | 0             | 0        | 0                   | 0                 | 0                 | 0         | 0          | 0                    |
| Bre-7-3      | 0           | 0              | 0             | 0                      | 0                     | 0                     | 0             | 0             | 0        | 0                   | 0                 | 0                 | 0         | 0          | 46095                |
| Bre-14-1     | 0           | 0              | 0             | 0                      | 0                     | 0                     | 0             | 0             | 0        | 0                   | 0                 | 0                 | 0         | 0          | 0                    |
| Bre-14-2     | 0           | 0              | 0             | 0                      | 0                     | 0                     | 0             | 0             | 0        | 0                   | 0                 | 0                 | 0         | 0          | 0                    |
| Bre-14-3     | 0           | 0              | 0             | 0                      | 0                     | 0                     | 0             | 0             | 0        | 0                   | 0                 | 0                 | 0         | 0          | 0                    |
| Bre-21-1     | 0           | 0              | 0             | 0                      | 0                     | 0                     | 0             | 0             | 0        | 0                   | 0                 | 0                 | 0         | 0          | 0                    |
| Bre-21-2     | 445489      | 0              | 394433        | 82633                  | 0                     | 0                     | 0             | 0             | 0        | 0                   | 0                 | 0                 | 0         | 0          | 0                    |
| Bre-21-3     | 1142389     | 0              | 1933048       | 114608                 | 0                     | 0                     | 1404891       | 471261        | 0        | 0                   | 0                 | 0                 | 0         | 0          | 0                    |

|          |         |        |         |         |          |          |         |         |         |          |        |         |        |   |   |   |
|----------|---------|--------|---------|---------|----------|----------|---------|---------|---------|----------|--------|---------|--------|---|---|---|
| Gul-0-1  | 0       | 0      | 0       | 0       | 0        | 0        | 0       | 0       | 0       | 5910696  | 92531  | 193405  | 0      | 0 | 0 | 0 |
| Gul-0-2  | 0       | 0      | 0       | 0       | 0        | 0        | 0       | 0       | 0       | 5914608  | 127656 | 212606  | 0      | 0 | 0 | 0 |
| Gul-0-3  | 0       | 0      | 0       | 0       | 0        | 0        | 0       | 0       | 0       | 5798840  | 148205 | 200882  | 0      | 0 | 0 | 0 |
| Gul-7-1  | 0       | 0      | 0       | 0       | 0        | 0        | 0       | 0       | 0       | 0        | 0      | 0       | 0      | 0 | 0 | 0 |
| Gul-7-2  | 0       | 0      | 0       | 0       | 0        | 0        | 0       | 0       | 0       | 0        | 0      | 23493   | 0      | 0 | 0 | 0 |
| Gul-7-3  | 0       | 0      | 0       | 0       | 0        | 0        | 0       | 0       | 0       | 0        | 0      | 0       | 0      | 0 | 0 | 0 |
| Gul-14-1 | 0       | 0      | 0       | 0       | 0        | 0        | 0       | 0       | 0       | 0        | 0      | 0       | 0      | 0 | 0 | 0 |
| Gul-14-2 | 0       | 0      | 0       | 0       | 0        | 0        | 0       | 0       | 0       | 0        | 0      | 0       | 0      | 0 | 0 | 0 |
| Gul-14-3 | 0       | 0      | 0       | 0       | 0        | 0        | 0       | 0       | 0       | 0        | 0      | 0       | 0      | 0 | 0 | 0 |
| Gul-21-1 | 0       | 0      | 0       | 0       | 0        | 0        | 0       | 0       | 0       | 0        | 0      | 0       | 0      | 0 | 0 | 0 |
| Gul-21-2 | 0       | 0      | 0       | 0       | 0        | 0        | 0       | 0       | 0       | 0        | 0      | 0       | 0      | 0 | 0 | 0 |
| Gul-21-3 | 0       | 0      | 0       | 0       | 0        | 0        | 0       | 0       | 0       | 0        | 0      | 0       | 0      | 0 | 0 | 0 |
| Cob-0-1  | 0       | 0      | 0       | 0       | 0        | 0        | 0       | 0       | 0       | 6877274  | 115439 | 163736  | 172341 | 0 | 0 | 0 |
| Cob-0-2  | 0       | 0      | 0       | 0       | 0        | 0        | 0       | 0       | 0       | 5607615  | 113879 | 153161  | 198668 | 0 | 0 | 0 |
| Cob-0-3  | 0       | 0      | 0       | 0       | 0        | 0        | 0       | 0       | 0       | 5558839  | 118841 | 135020  | 134646 | 0 | 0 | 0 |
| Cob-7-1  | 0       | 0      | 0       | 0       | 0        | 0        | 0       | 0       | 0       | 0        | 0      | 0       | 0      | 0 | 0 | 0 |
| Cob-7-2  | 0       | 0      | 0       | 0       | 0        | 0        | 0       | 0       | 0       | 0        | 0      | 0       | 0      | 0 | 0 | 0 |
| Cob-7-3  | 0       | 0      | 0       | 0       | 0        | 0        | 0       | 0       | 0       | 0        | 0      | 0       | 0      | 0 | 0 | 0 |
| Cob-14-1 | 0       | 0      | 0       | 0       | 0        | 0        | 0       | 0       | 0       | 0        | 0      | 0       | 0      | 0 | 0 | 0 |
| Cob-14-2 | 0       | 0      | 0       | 0       | 0        | 0        | 0       | 0       | 0       | 0        | 0      | 0       | 0      | 0 | 0 | 0 |
| Cob-14-3 | 0       | 0      | 0       | 0       | 0        | 0        | 0       | 0       | 0       | 0        | 0      | 0       | 0      | 0 | 0 | 0 |
| Cob-21-1 | 0       | 0      | 0       | 0       | 0        | 0        | 0       | 0       | 0       | 0        | 0      | 0       | 0      | 0 | 0 | 0 |
| Cob-21-2 | 0       | 0      | 0       | 0       | 0        | 0        | 0       | 0       | 0       | 0        | 0      | 0       | 0      | 0 | 0 | 0 |
| Cob-21-3 | 0       | 0      | 0       | 0       | 0        | 0        | 0       | 0       | 0       | 0        | 0      | 0       | 0      | 0 | 0 | 0 |
| Hal-0-1  | 0       | 0      | 0       | 0       | 0        | 0        | 0       | 0       | 0       | 4056053  | 0      | 78333   | 214413 | 0 | 0 | 0 |
| Hal-0-2  | 0       | 0      | 0       | 0       | 0        | 0        | 0       | 0       | 0       | 5377650  | 46806  | 75218   | 0      | 0 | 0 | 0 |
| Hal-0-3  | 0       | 0      | 0       | 0       | 0        | 0        | 0       | 0       | 0       | 5413156  | 0      | 83166   | 0      | 0 | 0 | 0 |
| Hal-7-1  | 0       | 0      | 0       | 0       | 0        | 0        | 0       | 0       | 0       | 941986   | 0      | 0       | 0      | 0 | 0 | 0 |
| Hal-7-2  | 0       | 0      | 0       | 0       | 0        | 0        | 0       | 0       | 0       | 1175400  | 0      | 0       | 0      | 0 | 0 | 0 |
| Hal-7-3  | 0       | 0      | 0       | 0       | 0        | 0        | 0       | 0       | 0       | 1158905  | 0      | 0       | 0      | 0 | 0 | 0 |
| Hal-14-1 | 0       | 0      | 0       | 0       | 0        | 0        | 0       | 0       | 0       | 1543603  | 0      | 0       | 0      | 0 | 0 | 0 |
| Hal-14-2 | 0       | 0      | 0       | 0       | 0        | 0        | 0       | 0       | 0       | 2115564  | 0      | 0       | 0      | 0 | 0 | 0 |
| Hal-14-3 | 0       | 0      | 0       | 0       | 0        | 0        | 0       | 0       | 0       | 2968058  | 0      | 0       | 0      | 0 | 0 | 0 |
| Hal-21-1 | 0       | 0      | 0       | 0       | 0        | 0        | 0       | 0       | 0       | 2508997  | 0      | 0       | 0      | 0 | 0 | 0 |
| Hal-21-2 | 0       | 0      | 0       | 0       | 0        | 0        | 0       | 0       | 0       | 1302700  | 0      | 0       | 0      | 0 | 0 | 0 |
| Hal-21-3 | 0       | 0      | 0       | 0       | 0        | 0        | 0       | 0       | 0       | 2388634  | 0      | 0       | 0      | 0 | 0 | 0 |
| Pse-0-1  | 0       | 0      | 0       | 0       | 0        | 0        | 0       | 0       | 0       | 4120705  | 108546 | 122148  | 0      | 0 | 0 | 0 |
| Pse-0-2  | 0       | 0      | 0       | 0       | 0        | 0        | 0       | 0       | 0       | 2521075  | 92103  | 154424  | 0      | 0 | 0 | 0 |
| Pse-0-3  | 0       | 0      | 0       | 0       | 0        | 0        | 0       | 0       | 0       | 3609146  | 91238  | 115216  | 0      | 0 | 0 | 0 |
| Pse-7-1  | 679762  | 0      | 816962  | 890690  | 3555291  | 0        | 0       | 0       | 0       | 0        | 0      | 162393  | 42296  | 0 | 0 | 0 |
| Pse-7-2  | 0       | 0      | 755174  | 770792  | 3133687  | 0        | 254249  | 0       | 0       | 0        | 0      | 0       | 0      | 0 | 0 | 0 |
| Pse-7-3  | 983058  | 78426  | 2769602 | 2481604 | 9944926  | 0        | 457701  | 0       | 428616  | 0        | 0      | 0       | 0      | 0 | 0 | 0 |
| Pse-14-1 | 81396   | 0      | 1448871 | 926031  | 6156396  | 0        | 722670  | 0       | 1640085 | 0        | 0      | 0       | 0      | 0 | 0 | 0 |
| Pse-14-2 | 464187  | 146282 | 3603010 | 1983417 | 13455445 | 0        | 1729617 | 471173  | 1446144 | 0        | 0      | 0       | 0      | 0 | 0 | 0 |
| Pse-14-3 | 104939  | 0      | 1246095 | 745973  | 5089568  | 0        | 626467  | 0       | 3498329 | 0        | 0      | 0       | 0      | 0 | 0 | 0 |
| Pse-21-1 | 510425  | 188420 | 6694222 | 2775860 | 0        | 20533825 | 4196655 | 0       | 1589675 | 0        | 0      | 0       | 0      | 0 | 0 | 0 |
| Pse-21-2 | 601796  | 326498 | 7364596 | 5264999 | 38582027 | 0        | 6351015 | 1094243 | 1998780 | 0        | 0      | 0       | 0      | 0 | 0 | 0 |
| Pse-21-3 | 664317  | 214539 | 5657985 | 3817440 | 0        | 24621941 | 3343044 | 732163  | 2825209 | 0        | 0      | 0       | 0      | 0 | 0 | 0 |
| Psy-0-1  | 0       | 0      | 0       | 0       | 0        | 0        | 0       | 0       | 0       | 29391754 | 88964  | 515385  | 256896 | 0 | 0 | 0 |
| Psy-0-2  | 0       | 0      | 0       | 0       | 0        | 0        | 0       | 0       | 0       | 47780608 | 301232 | 4452467 | 0      | 0 | 0 | 0 |
| Psy-0-3  | 0       | 0      | 0       | 0       | 0        | 0        | 0       | 0       | 0       | 46519379 | 206773 | 2564520 | 0      | 0 | 0 | 0 |
| Psy-7-1  | 1093475 | 0      | 485447  | 108376  | 1165902  | 0        | 0       | 0       | 0       | 0        | 0      | 1396286 | 0      | 0 | 0 | 0 |
| Psy-7-2  | 1714551 | 0      | 512386  | 41282   | 780151   | 0        | 0       | 0       | 0       | 0        | 0      | 1101170 | 0      | 0 | 0 | 0 |
| Psy-7-3  | 120044  | 0      | 0       | 0       | 281987   | 0        | 0       | 0       | 0       | 0        | 0      | 768198  | 0      | 0 | 0 | 0 |
| Psy-14-1 | 63944   | 0      | 0       | 0       | 359857   | 0        | 0       | 0       | 0       | 0        | 0      | 613997  | 0      | 0 | 0 | 0 |
| Psy-14-2 | 163545  | 0      | 0       | 0       | 136138   | 0        | 0       | 0       | 0       | 0        | 0      | 221342  | 0      | 0 | 0 | 0 |
| Psy-14-3 | 0       | 0      | 122754  | 154829  | 1303551  | 0        | 0       | 0       | 0       | 0        | 0      | 637818  | 0      | 0 | 0 | 0 |
| Psy-21-1 | 0       | 0      | 0       | 0       | 428465   | 0        | 0       | 0       | 0       | 0        | 0      | 66452   | 0      | 0 | 0 | 0 |
| Psy-21-2 | 725417  | 0      | 292184  | 402102  | 2064875  | 0        | 0       | 0       | 0       | 0        | 0      | 122061  | 0      | 0 | 0 | 0 |
| Psy-21-3 | 940553  | 0      | 524057  | 793904  | 1731889  | 0        | 246276  | 0       | 0       | 0        | 0      | 69217   | 0      | 0 | 0 | 0 |

Car, *Carnobacterium* sp. SN-1-4; Ent, *Enterococcus* sp. 8B5; Bra, *Brachy bacterium* sp. FU-4-2; Bre, *Brevibacterium* sp. FU-2-6; Gul, *Gultamicibacter* sp. FU-2-5; Gul, *Gultamicibacter* sp. FU-2-5; Cob, *Cobetia marina* NBRC102605; Hal, *Halomonas* sp. SN-2-8; Pse, *Pseudoalteromonas* sp. TS-4-4; Psy, *Psychrobacter* sp. FU-2-4  
The sample name separated by a hyphen indicates the control or bacterial name, ripening days, and sample number from the front.

| 3-Methylbutanal | Acetaldehyde | 2-Methylpropanal | 2-Methylbutanal | Ethyl Acetate | 2-Hydroxyethyl propanoate | Ethyl propanoate | Ethyl butanoate | Ethyl hexanoate | Acetone | 2-Heptanone | Diacetyl | Acetoin  | 2-Butanone | 2-Pentanone | 2-Nonanone | 2,3-Pentanedione |
|-----------------|--------------|------------------|-----------------|---------------|---------------------------|------------------|-----------------|-----------------|---------|-------------|----------|----------|------------|-------------|------------|------------------|
| 0               | 0            | 0                | 0               | 4626802       | 0                         | 0                | 0               | 0               | 1840783 | 130372      | 176186   | 48096    | 0          | 0           | 0          | 0                |
| 0               | 0            | 0                | 0               | 4088293       | 0                         | 0                | 0               | 0               | 1155459 | 0           | 677864   | 0        | 0          | 0           | 0          | 0                |
| 0               | 0            | 0                | 0               | 3840432       | 0                         | 0                | 0               | 0               | 1097393 | 251092      | 592480   | 474162   | 0          | 0           | 0          | 0                |
| 0               | 0            | 0                | 0               | 642566        | 577125                    | 0                | 0               | 0               | 209019  | 472875      | 752618   | 2610930  | 0          | 0           | 0          | 0                |
| 59023           | 0            | 0                | 0               | 698656        | 684531                    | 0                | 0               | 0               | 275341  | 300408      | 615483   | 1870690  | 0          | 0           | 0          | 0                |
| 39057           | 0            | 0                | 0               | 568446        | 729420                    | 0                | 0               | 0               | 168073  | 193889      | 440013   | 1773055  | 0          | 0           | 0          | 0                |
| 51340           | 0            | 0                | 0               | 1073530       | 1012005                   | 0                | 0               | 0               | 188086  | 137216      | 486727   | 1683173  | 0          | 0           | 0          | 0                |
| 53412           | 0            | 0                | 0               | 1435642       | 1502709                   | 0                | 0               | 0               | 193580  | 90452       | 488036   | 1314300  | 0          | 0           | 0          | 0                |
| 46123           | 0            | 0                | 0               | 971928        | 1032852                   | 0                | 0               | 0               | 144973  | 157374      | 275436   | 1252144  | 0          | 0           | 0          | 0                |
| 0               | 509165       | 0                | 0               | 0             | 186269                    | 0                | 0               | 0               | 236008  | 0           | 0        | 0        | 0          | 0           | 0          | 0                |
| 0               | 0            | 0                | 0               | 584933        | 834744                    | 0                | 0               | 0               | 195407  | 53014       | 529058   | 2253500  | 0          | 0           | 0          | 0                |
| 60734           | 0            | 0                | 0               | 638755        | 387534                    | 0                | 0               | 0               | 243252  | 149805      | 528394   | 2637652  | 0          | 0           | 0          | 0                |
| 286414          | 0            | 0                | 0               | 2067954       | 118126                    | 0                | 0               | 0               | 707756  | 724007      | 397704   | 1638473  | 0          | 0           | 0          | 0                |
| 0               | 0            | 0                | 0               | 3051687       | 0                         | 0                | 0               | 0               | 721204  | 412422      | 891540   | 0        | 0          | 0           | 0          | 0                |
| 0               | 0            | 0                | 0               | 3544082       | 0                         | 0                | 0               | 0               | 862338  | 825224      | 635013   | 618494   | 0          | 0           | 0          | 0                |
| 766287          | 0            | 87186            | 0               | 0             | 0                         | 0                | 0               | 0               | 0       | 55059       | 0        | 0        | 0          | 81305       | 0          | 0                |
| 597500          | 0            | 103730           | 100438          | 0             | 0                         | 0                | 0               | 0               | 0       | 33599       | 0        | 0        | 13208      | 30055       | 0          | 0                |
| 306663          | 0            | 38227            | 0               | 0             | 0                         | 0                | 0               | 0               | 0       | 0           | 0        | 0        | 0          | 0           | 0          | 0                |
| 282231          | 0            | 79172            | 93939           | 0             | 0                         | 0                | 0               | 65442           | 0       | 0           | 0        | 0        | 27870      | 156199      | 0          | 0                |
| 336670          | 0            | 127194           | 134457          | 0             | 0                         | 0                | 0               | 0               | 0       | 0           | 0        | 0        | 24606      | 111640      | 0          | 0                |
| 669838          | 0            | 276890           | 284120          | 0             | 0                         | 0                | 0               | 0               | 0       | 0           | 0        | 0        | 70718      | 241147      | 0          | 0                |
| 250025          | 0            | 0                | 155573          | 0             | 0                         | 0                | 0               | 0               | 233236  | 38541       | 0        | 0        | 0          | 233883      | 0          | 0                |
| 405689          | 0            | 256777           | 279854          | 0             | 0                         | 0                | 0               | 0               | 0       | 0           | 0        | 0        | 59950      | 296405      | 0          | 0                |
| 190554          | 0            | 0                | 158230          | 0             | 0                         | 0                | 0               | 411093          | 0       | 0           | 0        | 0        | 58577      | 311027      | 0          | 0                |
| 0               | 0            | 0                | 0               | 769097        | 0                         | 0                | 0               | 0               | 677308  | 0           | 521249   | 0        | 69969      | 333122      | 0          | 0                |
| 0               | 0            | 0                | 0               | 979906        | 0                         | 0                | 0               | 0               | 676623  | 0           | 584854   | 0        | 71985      | 298231      | 0          | 0                |
| 0               | 0            | 0                | 0               | 775129        | 0                         | 0                | 0               | 0               | 795491  | 402495      | 415047   | 1435971  | 94996      | 258494      | 0          | 0                |
| 91075           | 0            | 0                | 0               | 672569        | 0                         | 0                | 0               | 0               | 116709  | 265397      | 1766032  | 20504602 | 0          | 0           | 0          | 0                |
| 251456          | 0            | 0                | 0               | 780193        | 0                         | 0                | 0               | 0               | 155338  | 232103      | 1940385  | 22656647 | 0          | 0           | 0          | 0                |
| 118003          | 0            | 0                | 0               | 560770        | 0                         | 0                | 0               | 0               | 82330   | 128409      | 1617986  | 23251960 | 0          | 0           | 0          | 0                |
| 533786          | 0            | 0                | 0               | 697142        | 0                         | 0                | 0               | 0               | 51905   | 223688      | 1626905  | 17527904 | 0          | 0           | 0          | 0                |
| 1018345         | 0            | 0                | 0               | 748277        | 0                         | 0                | 0               | 0               | 229788  | 106572      | 1325030  | 8385258  | 0          | 0           | 0          | 0                |
| 186328          | 0            | 0                | 0               | 641194        | 0                         | 0                | 0               | 0               | 80123   | 261452      | 1419849  | 14808534 | 0          | 0           | 0          | 0                |
| 370479          | 0            | 0                | 0               | 671876        | 0                         | 0                | 0               | 0               | 188617  | 0           | 1113743  | 4779631  | 0          | 0           | 0          | 0                |
| 470361          | 0            | 0                | 0               | 546180        | 0                         | 0                | 0               | 0               | 224949  | 268649      | 1558460  | 8385775  | 0          | 0           | 0          | 0                |
| 912632          | 0            | 0                | 0               | 767282        | 0                         | 0                | 0               | 0               | 283905  | 0           | 1133649  | 0        | 0          | 0           | 0          | 0                |
| 0               | 0            | 0                | 0               | 3848909       | 51072                     | 0                | 0               | 0               | 1282037 | 48577       | 331851   | 558502   | 0          | 0           | 0          | 0                |
| 0               | 0            | 0                | 0               | 5406522       | 33919                     | 0                | 0               | 0               | 1061323 | 37330       | 351553   | 620262   | 0          | 0           | 0          | 0                |
| 0               | 0            | 0                | 0               | 6612338       | 21574                     | 0                | 0               | 0               | 926601  | 59927       | 526532   | 737957   | 0          | 0           | 0          | 0                |
| 0               | 0            | 0                | 0               | 57596         | 0                         | 0                | 0               | 0               | 41162   | 0           | 383295   | 3673645  | 0          | 0           | 0          | 0                |
| 0               | 0            | 0                | 0               | 50441         | 27718                     | 0                | 0               | 0               | 58646   | 0           | 362905   | 4374015  | 0          | 0           | 0          | 0                |
| 0               | 0            | 0                | 0               | 51492         | 0                         | 0                | 0               | 0               | 69348   | 0           | 421145   | 1860803  | 0          | 0           | 0          | 0                |
| 0               | 0            | 0                | 0               | 51939         | 150087                    | 0                | 0               | 0               | 52828   | 0           | 311449   | 3183921  | 0          | 0           | 0          | 0                |
| 0               | 0            | 0                | 0               | 79885         | 103944                    | 0                | 0               | 0               | 52212   | 0           | 367528   | 4119222  | 0          | 0           | 0          | 0                |
| 0               | 0            | 0                | 0               | 39227         | 0                         | 0                | 0               | 0               | 49845   | 0           | 284835   | 4577216  | 0          | 0           | 0          | 0                |
| 0               | 0            | 0                | 0               | 109009        | 0                         | 0                | 0               | 0               | 55363   | 0           | 202520   | 4787926  | 0          | 0           | 0          | 0                |
| 0               | 0            | 0                | 0               | 122744        | 0                         | 0                | 0               | 0               | 43413   | 0           | 233885   | 2397062  | 0          | 0           | 0          | 0                |
| 0               | 0            | 0                | 0               | 166820        | 0                         | 0                | 0               | 0               | 43358   | 0           | 315829   | 2583728  | 0          | 0           | 0          | 0                |
| 0               | 0            | 0                | 0               | 4482473       | 50348                     | 0                | 0               | 0               | 1052720 | 115022      | 204223   | 342870   | 0          | 0           | 0          | 0                |
| 0               | 0            | 0                | 0               | 3085866       | 32147                     | 0                | 0               | 0               | 1145345 | 58118       | 119333   | 254393   | 0          | 0           | 0          | 0                |
| 0               | 0            | 0                | 0               | 3378808       | 24782                     | 0                | 0               | 0               | 1339464 | 91753       | 147386   | 287333   | 0          | 0           | 0          | 0                |
| 0               | 0            | 0                | 0               | 0             | 0                         | 0                | 0               | 0               | 4389552 | 0           | 0        | 0        | 0          | 0           | 0          | 0                |
| 0               | 0            | 0                | 0               | 0             | 0                         | 0                | 0               | 0               | 3401658 | 0           | 309806   | 0        | 273200     | 718601      | 0          | 0                |
| 0               | 0            | 0                | 0               | 0             | 0                         | 0                | 0               | 0               | 5700870 | 79323       | 177041   | 97828    | 316041     | 1356294     | 0          | 0                |
| 0               | 0            | 0                | 0               | 0             | 0                         | 0                | 0               | 0               | 586184  | 22975       | 0        | 0        | 0          | 70982       | 0          | 0                |
| 0               | 0            | 0                | 0               | 0             | 0                         | 0                | 0               | 0               | 611191  | 0           | 0        | 0        | 0          | 0           | 0          | 0                |
| 0               | 0            | 0                | 0               | 0             | 0                         | 0                | 0               | 0               | 735305  | 0           | 0        | 0        | 0          | 0           | 0          | 0                |
| 0               | 0            | 0                | 0               | 0             | 0                         | 0                | 0               | 0               | 527666  | 0           | 0        | 0        | 0          | 92400       | 0          | 0                |
| 0               | 0            | 0                | 0               | 0             | 0                         | 0                | 0               | 0               | 2351637 | 0           | 0        | 0        | 0          | 0           | 0          | 0                |
| 0               | 0            | 0                | 0               | 0             | 0                         | 0                | 0               | 0               | 877020  | 0           | 0        | 0        | 0          | 0           | 0          | 0                |

|         |   |        |       |         |        |        |         |        |         |        |         |         |         |        |       |        |
|---------|---|--------|-------|---------|--------|--------|---------|--------|---------|--------|---------|---------|---------|--------|-------|--------|
| 25040   | 0 | 0      | 0     | 4589445 | 0      | 0      | 0       | 0      | 1038832 | 99969  | 116649  | 367211  | 0       | 0      | 0     | 0      |
| 48162   | 0 | 0      | 0     | 4039929 | 27751  | 0      | 0       | 0      | 1990614 | 114410 | 117184  | 309181  | 0       | 0      | 0     | 0      |
| 0       | 0 | 0      | 0     | 2761654 | 0      | 0      | 0       | 0      | 1733039 | 97622  | 142956  | 314567  | 0       | 0      | 0     | 0      |
| 0       | 0 | 0      | 0     | 120231  | 87311  | 0      | 0       | 0      | 1171367 | 30411  | 981369  | 131697  | 663156  | 0      | 0     | 25009  |
| 0       | 0 | 0      | 0     | 108482  | 0      | 0      | 0       | 0      | 632053  | 32286  | 948132  | 94380   | 166080  | 0      | 0     | 38987  |
| 0       | 0 | 0      | 0     | 101984  | 0      | 0      | 0       | 0      | 626050  | 29097  | 422634  | 70412   | 181271  | 0      | 0     | 0      |
| 0       | 0 | 0      | 0     | 53708   | 0      | 0      | 0       | 0      | 1331178 | 16409  | 709829  | 101153  | 484729  | 0      | 0     | 27477  |
| 0       | 0 | 0      | 0     | 62642   | 0      | 0      | 0       | 0      | 1044566 | 0      | 594986  | 88477   | 419594  | 0      | 0     | 22030  |
| 0       | 0 | 0      | 0     | 41801   | 0      | 0      | 0       | 0      | 1319129 | 47968  | 537053  | 135713  | 871438  | 0      | 0     | 0      |
| 0       | 0 | 0      | 0     | 82715   | 0      | 0      | 0       | 0      | 2687196 | 0      | 518605  | 360944  | 1849349 | 0      | 0     | 0      |
| 0       | 0 | 0      | 0     | 70733   | 0      | 0      | 0       | 0      | 993287  | 0      | 295151  | 238513  | 789661  | 0      | 0     | 0      |
| 0       | 0 | 0      | 0     | 94828   | 0      | 0      | 0       | 0      | 1209077 | 0      | 512888  | 308133  | 834495  | 0      | 0     | 0      |
| 0       | 0 | 0      | 0     | 3188859 | 69880  | 0      | 0       | 0      | 1330461 | 176993 | 147236  | 378598  | 0       | 0      | 0     | 0      |
| 0       | 0 | 0      | 0     | 2811100 | 52790  | 0      | 0       | 0      | 1185600 | 100262 | 84517   | 354688  | 0       | 0      | 0     | 0      |
| 0       | 0 | 0      | 0     | 3197146 | 28537  | 0      | 0       | 0      | 1812906 | 127076 | 106405  | 321877  | 0       | 0      | 0     | 0      |
| 0       | 0 | 0      | 0     | 54619   | 0      | 0      | 0       | 0      | 812638  | 26369  | 0       | 0       | 62908   | 124177 | 0     | 0      |
| 0       | 0 | 0      | 0     | 41034   | 0      | 0      | 0       | 0      | 1124575 | 22577  | 0       | 0       | 91500   | 143708 | 0     | 0      |
| 0       | 0 | 0      | 0     | 51585   | 0      | 0      | 0       | 0      | 710296  | 0      | 0       | 0       | 75585   | 147795 | 0     | 0      |
| 0       | 0 | 0      | 0     | 29671   | 0      | 0      | 0       | 0      | 720113  | 0      | 0       | 0       | 202470  | 289021 | 0     | 0      |
| 0       | 0 | 0      | 0     | 36580   | 0      | 0      | 0       | 0      | 432560  | 0      | 0       | 0       | 137132  | 314228 | 0     | 0      |
| 0       | 0 | 0      | 0     | 46746   | 0      | 0      | 0       | 0      | 403552  | 0      | 0       | 0       | 109773  | 228423 | 0     | 0      |
| 0       | 0 | 0      | 0     | 54541   | 0      | 0      | 0       | 0      | 182026  | 24778  | 0       | 0       | 126337  | 297532 | 0     | 0      |
| 0       | 0 | 0      | 0     | 44073   | 0      | 0      | 0       | 0      | 397458  | 0      | 0       | 0       | 239134  | 352493 | 0     | 0      |
| 0       | 0 | 0      | 0     | 19593   | 0      | 0      | 0       | 0      | 142788  | 0      | 0       | 0       | 153989  | 106378 | 0     | 0      |
| 0       | 0 | 0      | 0     | 6956224 | 34624  | 0      | 0       | 0      | 769682  | 107679 | 828651  | 1940207 | 0       | 0      | 85810 | 0      |
| 0       | 0 | 0      | 0     | 5698927 | 106507 | 0      | 0       | 0      | 562445  | 87453  | 819026  | 1649182 | 0       | 0      | 0     | 0      |
| 0       | 0 | 0      | 0     | 5065278 | 57216  | 0      | 0       | 0      | 876256  | 71778  | 879710  | 2447348 | 0       | 0      | 0     | 0      |
| 0       | 0 | 0      | 0     | 52196   | 0      | 0      | 0       | 0      | 135745  | 0      | 23139   | 0       | 0       | 21990  | 0     | 0      |
| 0       | 0 | 0      | 0     | 54102   | 0      | 0      | 0       | 0      | 99322   | 0      | 0       | 0       | 0       | 71994  | 0     | 0      |
| 0       | 0 | 0      | 0     | 47563   | 0      | 0      | 0       | 0      | 91634   | 0      | 0       | 0       | 0       | 48451  | 0     | 0      |
| 0       | 0 | 0      | 0     | 36029   | 0      | 0      | 0       | 0      | 105349  | 0      | 0       | 0       | 231140  | 135434 | 0     | 0      |
| 0       | 0 | 0      | 0     | 67010   | 0      | 0      | 0       | 0      | 215534  | 0      | 0       | 0       | 129062  | 146154 | 0     | 0      |
| 0       | 0 | 0      | 0     | 49476   | 40809  | 0      | 0       | 0      | 134062  | 0      | 0       | 0       | 48933   | 71542  | 0     | 0      |
| 0       | 0 | 0      | 0     | 121643  | 0      | 0      | 0       | 0      | 54631   | 0      | 35168   | 159629  | 0       | 0      | 0     | 0      |
| 0       | 0 | 0      | 0     | 0       | 0      | 0      | 0       | 0      | 25154   | 0      | 0       | 0       | 0       | 0      | 0     | 0      |
| 0       | 0 | 0      | 0     | 148279  | 0      | 0      | 0       | 0      | 28206   | 0      | 27021   | 39417   | 0       | 0      | 0     | 0      |
| 25490   | 0 | 0      | 0     | 2144502 | 0      | 0      | 0       | 0      | 484643  | 117684 | 147502  | 434158  | 0       | 0      | 0     | 0      |
| 14951   | 0 | 0      | 0     | 2866266 | 0      | 0      | 0       | 0      | 612242  | 134450 | 137943  | 487539  | 0       | 0      | 0     | 0      |
| 20910   | 0 | 0      | 0     | 2845209 | 0      | 0      | 0       | 0      | 1727000 | 197224 | 169664  | 327441  | 0       | 0      | 0     | 0      |
| 232896  | 0 | 0      | 14384 | 59753   | 0      | 0      | 0       | 0      | 2930006 | 37729  | 0       | 257564  | 180431  | 695598 | 0     | 0      |
| 398144  | 0 | 0      | 0     | 54404   | 0      | 0      | 0       | 0      | 2406194 | 46795  | 0       | 225614  | 169671  | 732063 | 0     | 0      |
| 166904  | 0 | 0      | 0     | 64254   | 0      | 0      | 910568  | 0      | 1576734 | 45976  | 0       | 260306  | 101961  | 922441 | 0     | 26469  |
| 113067  | 0 | 0      | 0     | 36597   | 75191  | 0      | 1481146 | 133257 | 35244   | 0      | 109329  | 86282   | 0       | 0      | 0     | 58048  |
| 323988  | 0 | 0      | 0     | 45434   | 0      | 0      | 3047160 | 253277 | 92016   | 85025  | 280388  | 0       | 0       | 0      | 0     | 105686 |
| 0       | 0 | 0      | 0     | 0       | 0      | 0      | 0       | 0      | 72647   | 0      | 191720  | 0       | 0       | 0      | 0     | 0      |
| 160718  | 0 | 0      | 0     | 141986  | 0      | 0      | 2456563 | 302913 | 0       | 0      | 120442  | 0       | 0       | 0      | 0     | 71881  |
| 320120  | 0 | 0      | 0     | 162141  | 0      | 0      | 4373713 | 262340 | 0       | 0      | 223877  | 84573   | 0       | 0      | 0     | 73424  |
| 253289  | 0 | 198097 | 56283 | 199368  | 0      | 0      | 3173446 | 153511 | 0       | 0      | 272279  | 510874  | 0       | 0      | 0     | 42432  |
| 118038  | 0 | 0      | 0     | 1059448 | 0      | 0      | 0       | 0      | 405404  | 253375 | 288591  | 173848  | 0       | 0      | 0     | 0      |
| 6273525 | 0 | 0      | 0     | 2148351 | 0      | 195758 | 0       | 0      | 2051622 | 736312 | 1088542 | 2223646 | 0       | 0      | 0     | 292880 |
| 2052665 | 0 | 0      | 0     | 1988812 | 84598  | 61623  | 0       | 0      | 1183372 | 595733 | 865847  | 1959545 | 0       | 0      | 0     | 133052 |
| 469082  | 0 | 0      | 0     | 34095   | 0      | 0      | 0       | 0      | 1330254 | 41424  | 0       | 0       | 367294  | 600314 | 0     | 0      |
| 328907  | 0 | 0      | 0     | 22787   | 0      | 0      | 0       | 0      | 606409  | 0      | 0       | 0       | 347412  | 434632 | 0     | 0      |
| 165308  | 0 | 0      | 0     | 24057   | 0      | 0      | 0       | 0      | 493739  | 42640  | 0       | 0       | 284050  | 346913 | 0     | 0      |
| 171641  | 0 | 0      | 0     | 33886   | 0      | 0      | 0       | 0      | 558016  | 24208  | 0       | 0       | 775560  | 397460 | 0     | 0      |
| 55492   | 0 | 0      | 0     | 37709   | 0      | 0      | 0       | 0      | 1281452 | 37071  | 0       | 49178   | 679300  | 505629 | 0     | 0      |
| 86842   | 0 | 0      | 0     | 42412   | 0      | 0      | 0       | 0      | 1321145 | 0      | 0       | 0       | 828604  | 495283 | 0     | 0      |
| 32510   | 0 | 0      | 0     | 172615  | 0      | 0      | 0       | 0      | 1396004 | 80765  | 0       | 45297   | 514440  | 335144 | 0     | 0      |
| 55946   | 0 | 0      | 0     | 98570   | 0      | 0      | 0       | 0      | 1721748 | 24879  | 0       | 32675   | 535237  | 288485 | 0     | 0      |
| 75128   | 0 | 0      | 0     | 112035  | 0      | 0      | 0       | 0      | 1576307 | 22997  | 0       | 83179   | 400460  | 252614 | 0     | 0      |



|        |       |       |         |         |       |        |        |   |        |   |   |   |        |
|--------|-------|-------|---------|---------|-------|--------|--------|---|--------|---|---|---|--------|
| 0      | 0     | 0     | 0       | 0       | 0     | 0      | 0      | 0 | 160204 | 0 | 0 | 0 | 0      |
| 0      | 0     | 0     | 0       | 0       | 0     | 0      | 0      | 0 | 179440 | 0 | 0 | 0 | 0      |
| 0      | 0     | 0     | 0       | 0       | 0     | 0      | 0      | 0 | 131740 | 0 | 0 | 0 | 0      |
| 27196  | 20114 | 0     | 0       | 223903  | 0     | 0      | 0      | 0 | 0      | 0 | 0 | 0 | 0      |
| 0      | 0     | 0     | 0       | 25332   | 0     | 0      | 0      | 0 | 0      | 0 | 0 | 0 | 0      |
| 0      | 0     | 0     | 0       | 59312   | 0     | 0      | 0      | 0 | 0      | 0 | 0 | 0 | 0      |
| 0      | 0     | 0     | 0       | 79461   | 0     | 0      | 0      | 0 | 0      | 0 | 0 | 0 | 0      |
| 0      | 14061 | 0     | 0       | 167626  | 0     | 0      | 0      | 0 | 0      | 0 | 0 | 0 | 0      |
| 0      | 0     | 0     | 0       | 296757  | 0     | 0      | 0      | 0 | 0      | 0 | 0 | 0 | 0      |
| 0      | 0     | 0     | 0       | 267252  | 0     | 0      | 0      | 0 | 0      | 0 | 0 | 0 | 0      |
| 0      | 0     | 0     | 0       | 388832  | 0     | 0      | 0      | 0 | 0      | 0 | 0 | 0 | 0      |
| 0      | 0     | 0     | 0       | 105595  | 0     | 0      | 0      | 0 | 0      | 0 | 0 | 0 | 0      |
| 0      | 0     | 0     | 0       | 0       | 0     | 0      | 0      | 0 | 0      | 0 | 0 | 0 | 0      |
| 0      | 0     | 0     | 0       | 0       | 0     | 0      | 0      | 0 | 0      | 0 | 0 | 0 | 0      |
| 0      | 0     | 0     | 0       | 0       | 0     | 0      | 0      | 0 | 0      | 0 | 0 | 0 | 0      |
| 0      | 0     | 0     | 0       | 90121   | 0     | 0      | 0      | 0 | 0      | 0 | 0 | 0 | 0      |
| 39414  | 0     | 0     | 0       | 150265  | 0     | 0      | 0      | 0 | 0      | 0 | 0 | 0 | 0      |
| 33056  | 0     | 0     | 0       | 75995   | 0     | 0      | 0      | 0 | 0      | 0 | 0 | 0 | 0      |
| 50646  | 0     | 0     | 0       | 486124  | 0     | 49491  | 0      | 0 | 0      | 0 | 0 | 0 | 0      |
| 0      | 0     | 0     | 0       | 391017  | 0     | 36185  | 0      | 0 | 0      | 0 | 0 | 0 | 0      |
| 0      | 0     | 0     | 0       | 397868  | 0     | 31005  | 0      | 0 | 0      | 0 | 0 | 0 | 0      |
| 0      | 0     | 0     | 0       | 576686  | 0     | 80670  | 32456  | 0 | 0      | 0 | 0 | 0 | 0      |
| 95132  | 0     | 0     | 35056   | 716835  | 0     | 144587 | 0      | 0 | 0      | 0 | 0 | 0 | 0      |
| 0      | 0     | 0     | 0       | 771398  | 0     | 165901 | 21343  | 0 | 0      | 0 | 0 | 0 | 0      |
| 0      | 0     | 0     | 0       | 0       | 0     | 0      | 0      | 0 | 0      | 0 | 0 | 0 | 0      |
| 0      | 0     | 0     | 0       | 0       | 0     | 0      | 0      | 0 | 170561 | 0 | 0 | 0 | 0      |
| 0      | 0     | 0     | 0       | 0       | 0     | 0      | 0      | 0 | 170692 | 0 | 0 | 0 | 0      |
| 0      | 0     | 0     | 0       | 46627   | 0     | 0      | 0      | 0 | 0      | 0 | 0 | 0 | 0      |
| 0      | 0     | 0     | 0       | 145934  | 0     | 0      | 0      | 0 | 0      | 0 | 0 | 0 | 0      |
| 0      | 0     | 0     | 0       | 93113   | 0     | 0      | 0      | 0 | 0      | 0 | 0 | 0 | 0      |
| 0      | 0     | 0     | 0       | 437473  | 0     | 35266  | 0      | 0 | 0      | 0 | 0 | 0 | 0      |
| 0      | 0     | 0     | 0       | 345600  | 0     | 22117  | 20012  | 0 | 0      | 0 | 0 | 0 | 0      |
| 0      | 0     | 0     | 0       | 261961  | 0     | 35601  | 0      | 0 | 0      | 0 | 0 | 0 | 0      |
| 0      | 0     | 0     | 0       | 22041   | 0     | 0      | 0      | 0 | 0      | 0 | 0 | 0 | 0      |
| 0      | 0     | 0     | 0       | 0       | 0     | 0      | 0      | 0 | 0      | 0 | 0 | 0 | 0      |
| 0      | 0     | 0     | 0       | 46119   | 0     | 0      | 0      | 0 | 0      | 0 | 0 | 0 | 0      |
| 0      | 0     | 0     | 0       | 0       | 0     | 0      | 0      | 0 | 154146 | 0 | 0 | 0 | 0      |
| 0      | 0     | 0     | 0       | 0       | 0     | 0      | 0      | 0 | 141077 | 0 | 0 | 0 | 0      |
| 0      | 0     | 0     | 0       | 0       | 0     | 0      | 0      | 0 | 133447 | 0 | 0 | 0 | 0      |
| 0      | 0     | 0     | 884465  | 4246013 | 0     | 251002 | 181855 | 0 | 0      | 0 | 0 | 0 | 0      |
| 0      | 0     | 0     | 1003365 | 5440956 | 48058 | 300514 | 190447 | 0 | 0      | 0 | 0 | 0 | 0      |
| 0      | 0     | 0     | 309611  | 3135468 | 78547 | 240890 | 52832  | 0 | 0      | 0 | 0 | 0 | 0      |
| 0      | 0     | 48404 | 0       | 437006  | 0     | 41142  | 0      | 0 | 0      | 0 | 0 | 0 | 36813  |
| 0      | 0     | 0     | 0       | 588272  | 35604 | 0      | 0      | 0 | 0      | 0 | 0 | 0 | 389744 |
| 0      | 0     | 0     | 0       | 523243  | 0     | 0      | 0      | 0 | 0      | 0 | 0 | 0 | 0      |
| 0      | 0     | 0     | 0       | 243794  | 0     | 0      | 0      | 0 | 0      | 0 | 0 | 0 | 0      |
| 0      | 0     | 0     | 0       | 200986  | 0     | 0      | 0      | 0 | 0      | 0 | 0 | 0 | 0      |
| 0      | 0     | 0     | 0       | 282179  | 0     | 0      | 0      | 0 | 0      | 0 | 0 | 0 | 0      |
| 0      | 0     | 0     | 0       | 0       | 0     | 0      | 0      | 0 | 0      | 0 | 0 | 0 | 0      |
| 0      | 0     | 0     | 0       | 0       | 0     | 0      | 0      | 0 | 0      | 0 | 0 | 0 | 0      |
| 0      | 0     | 0     | 0       | 0       | 0     | 0      | 0      | 0 | 470075 | 0 | 0 | 0 | 0      |
| 0      | 0     | 0     | 0       | 516612  | 0     | 0      | 0      | 0 | 0      | 0 | 0 | 0 | 0      |
| 44108  | 0     | 0     | 0       | 689038  | 0     | 43681  | 0      | 0 | 0      | 0 | 0 | 0 | 0      |
| 0      | 0     | 0     | 0       | 625933  | 0     | 65350  | 22549  | 0 | 0      | 0 | 0 | 0 | 0      |
| 121446 | 0     | 0     | 64155   | 1235217 | 44401 | 33055  | 30551  | 0 | 0      | 0 | 0 | 0 | 0      |
| 101290 | 0     | 0     | 0       | 601127  | 0     | 22564  | 0      | 0 | 0      | 0 | 0 | 0 | 0      |
| 0      | 0     | 0     | 0       | 563977  | 0     | 0      | 0      | 0 | 0      | 0 | 0 | 0 | 0      |
| 43489  | 0     | 0     | 0       | 547048  | 0     | 36488  | 0      | 0 | 0      | 0 | 0 | 0 | 0      |
| 32252  | 0     | 0     | 0       | 455372  | 0     | 37523  | 0      | 0 | 0      | 0 | 0 | 0 | 0      |
| 0      | 0     | 0     | 0       | 395252  | 0     | 44602  | 0      | 0 | 0      | 0 | 0 | 0 | 0      |

**Table S6.** The loadings for the components PC1–PC5 of the principal component analysis performed on the cheese-ripening test samples.

| Compounds                     | Category        | PC1    | PC2    | PC3    | PC4    | PC5    |
|-------------------------------|-----------------|--------|--------|--------|--------|--------|
| Acetic acid                   | Acid            | 0.815  | 0.076  | 0.000  | 0.133  | -0.050 |
| Propanoic acid                | Acid            | 0.811  | -0.486 | 0.067  | 0.208  | 0.124  |
| Butanoic acid                 | Acid            | 0.872  | -0.398 | 0.054  | 0.149  | 0.048  |
| 2-Methylpropanoic acid        | Acid            | 0.901  | -0.299 | 0.039  | 0.207  | 0.081  |
| 3-Methylbutanoic acid         | Acid            | 0.650  | -0.205 | 0.028  | -0.077 | 0.546  |
| 2-Methylbutanoic acid         | Acid            | 0.478  | -0.370 | 0.050  | 0.365  | -0.560 |
| Hexanoic acid                 | Acid            | 0.776  | -0.505 | 0.071  | 0.133  | 0.101  |
| Octanoic acid                 | Acid            | 0.685  | -0.487 | 0.065  | 0.244  | 0.142  |
| Ethanol                       | Alcohol         | -0.794 | -0.244 | -0.084 | 0.349  | 0.186  |
| 2-Methyl-1-propanol           | Alcohol         | -0.346 | 0.050  | 0.875  | 0.075  | 0.035  |
| Isopentyl alcohol             | Alcohol         | -0.416 | 0.057  | 0.832  | 0.282  | 0.158  |
| Isopropyl Alcohol             | Alcohol         | -0.567 | -0.165 | -0.538 | 0.211  | 0.104  |
| 1-Butanol                     | Alcohol         | -0.308 | 0.018  | 0.848  | 0.290  | 0.189  |
| 1-Methoxy-2-propanol          | Alcohol         | -0.283 | 0.015  | 0.756  | 0.281  | 0.189  |
| 3-Methylbutanal               | Aldehyde        | 0.847  | 0.194  | -0.121 | 0.235  | 0.236  |
| Acetaldehyde                  | Aldehyde        | -0.026 | 0.013  | -0.018 | -0.387 | -0.292 |
| 2-Methylpropanal              | Aldehyde        | 0.370  | -0.292 | 0.034  | 0.502  | -0.626 |
| 2-Methylbutanal               | Aldehyde        | 0.408  | -0.157 | 0.020  | 0.534  | -0.634 |
| Ethyl Acetate                 | Ester           | -0.506 | 0.007  | 0.671  | -0.018 | -0.053 |
| 2-Hydroxyethyl propanoate     | Ester           | -0.551 | -0.215 | -0.590 | 0.222  | 0.135  |
| Ethyl butanoate               | Ester           | 0.832  | -0.510 | 0.066  | 0.088  | 0.156  |
| Ethyl hexanoate               | Ester           | 0.750  | -0.523 | 0.070  | -0.053 | 0.185  |
| Acetone                       | Ketone          | 0.074  | 0.863  | 0.256  | 0.118  | -0.021 |
| 2-Heptanone                   | Ketone          | -0.576 | -0.062 | -0.137 | 0.183  | 0.195  |
| Diacetyl                      | Ketone          | -0.638 | -0.427 | 0.052  | 0.495  | 0.308  |
| Acetoin                       | Ketone          | -0.588 | -0.199 | -0.586 | 0.404  | 0.145  |
| 2-Butanone                    | Ketone          | 0.360  | 0.884  | -0.119 | 0.224  | 0.057  |
| 2-Pentanone                   | Ketone          | 0.387  | 0.842  | -0.117 | 0.192  | 0.106  |
| 2,3-Pentanedione              | Ketone          | 0.765  | -0.430 | 0.053  | -0.136 | 0.300  |
| 3-Hydroxy-3-methyl-2-butanone | Ketone          | 0.102  | -0.057 | -0.002 | -0.405 | -0.007 |
| Dimethyl sulfide              | Sulfur compound | 0.331  | 0.867  | -0.117 | 0.226  | 0.045  |
| Dimethyl disulfide            | Sulfur compound | 0.440  | 0.856  | -0.120 | 0.183  | 0.090  |
| Dimethyl trisulfide           | Sulfur compound | 0.424  | 0.513  | -0.085 | 0.030  | 0.327  |
| Methanethiol                  | Sulfur compound | 0.390  | 0.879  | -0.123 | 0.173  | 0.091  |
| S-Methyl thioacetate          | Sulfur compound | 0.325  | 0.860  | -0.115 | 0.227  | 0.036  |
| 1,2-Dimethoxyethane           | Other           | -0.329 | 0.029  | 0.881  | 0.216  | 0.137  |
| Chloroform                    | Other           | -0.565 | -0.223 | -0.608 | 0.315  | 0.189  |
| Pyridine                      | Other           | -0.432 | -0.174 | -0.476 | 0.299  | 0.181  |
| Toluene                       | Other           | -0.197 | -0.090 | -0.260 | 0.176  | 0.095  |
| 2,5-Dimethylpyrazine          | Other           | 0.311  | -0.178 | 0.016  | -0.219 | 0.434  |

Volatile compounds data of the control and cheese inoculated with *Pseudoalteromonas* sp. TS-4-4 samples obtained from ripening tests are used for principal component analysis.
